# Supplementary material for: Nanosecond Electric Pulses are Equally Effective in Electrochemotherapy with Cisplatin as Microsecond Pulses
Source: PubMed Central journal article supplement — Radiol Oncol. 2022 Aug 14;56(3):326–35. doi: 10.2478/raon-2022-0028 (PMC9400447; doi:10.2478/raon-2022-0028), 2022-08-14
Supplement: raon-56-346_sm.pdf [file raon-56-346_sm.pdf]

# Nanosecond electric pulses are equally effective in electrochemotherapy with cisplatin as microsecond pulses

Angelika Vizintin, Stefan Markovic, Janez Scancar, Jerneja Kladnik, Iztok Turel, Damijan Miklavcic

doi: 10.2478/raon-2022-0028

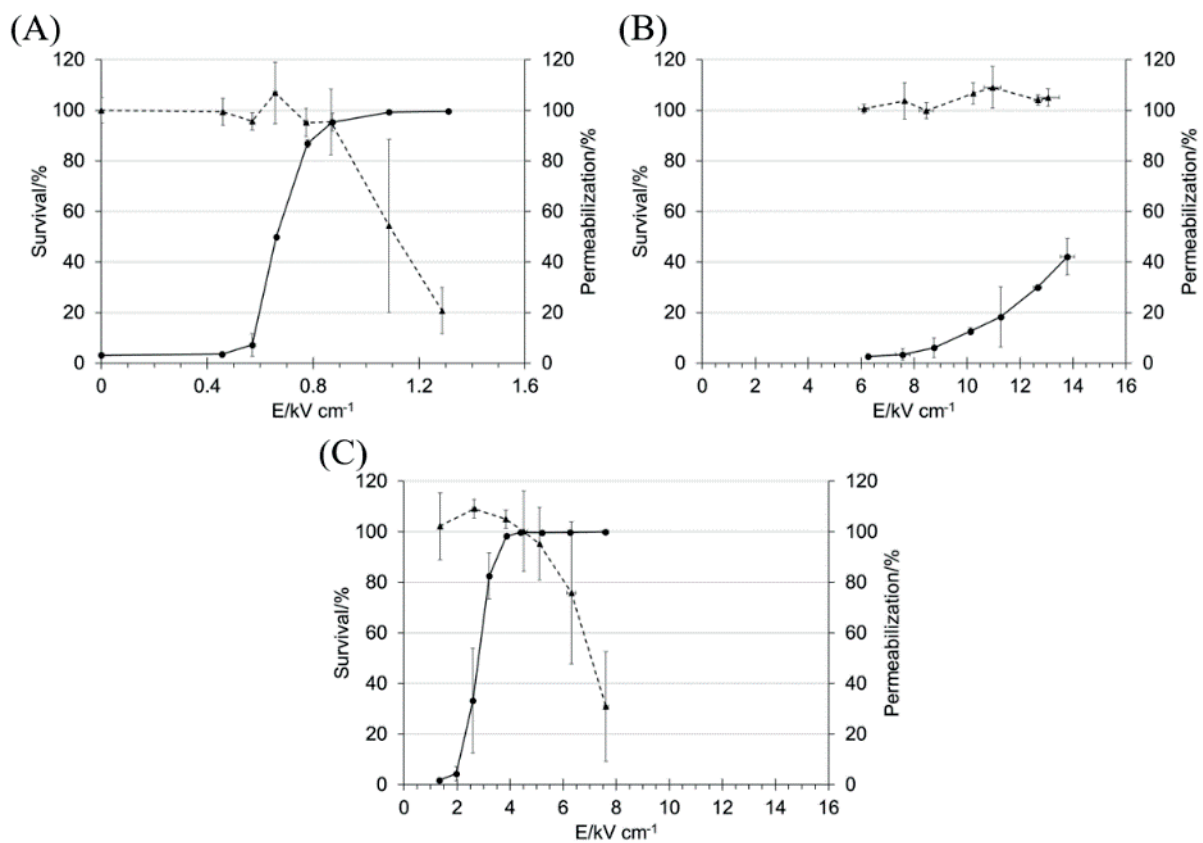

**SUPPLEMENTAL FIGURE S1.** Cell survival (triangles, dashed black line) and cell membrane permeabilization rate (circles, solid black line) of mouse skin melanoma B16F1 cells at different electric field strengths (E) after delivery of **(A)** 8 × 100 μs pulses, 1 Hz repetition rate, **(B)** 1 × 200 ns pulse, **(C)** 25 × 400 ns pulses, 10 Hz repetition rate. Cell survival was measured 72 h after treatment by the metabolic MTS assay, cell membrane permeabilization was determined as the proportion of cells fluorescing YO-PRO1 3 minutes after treatment. Bars represent standard deviation.

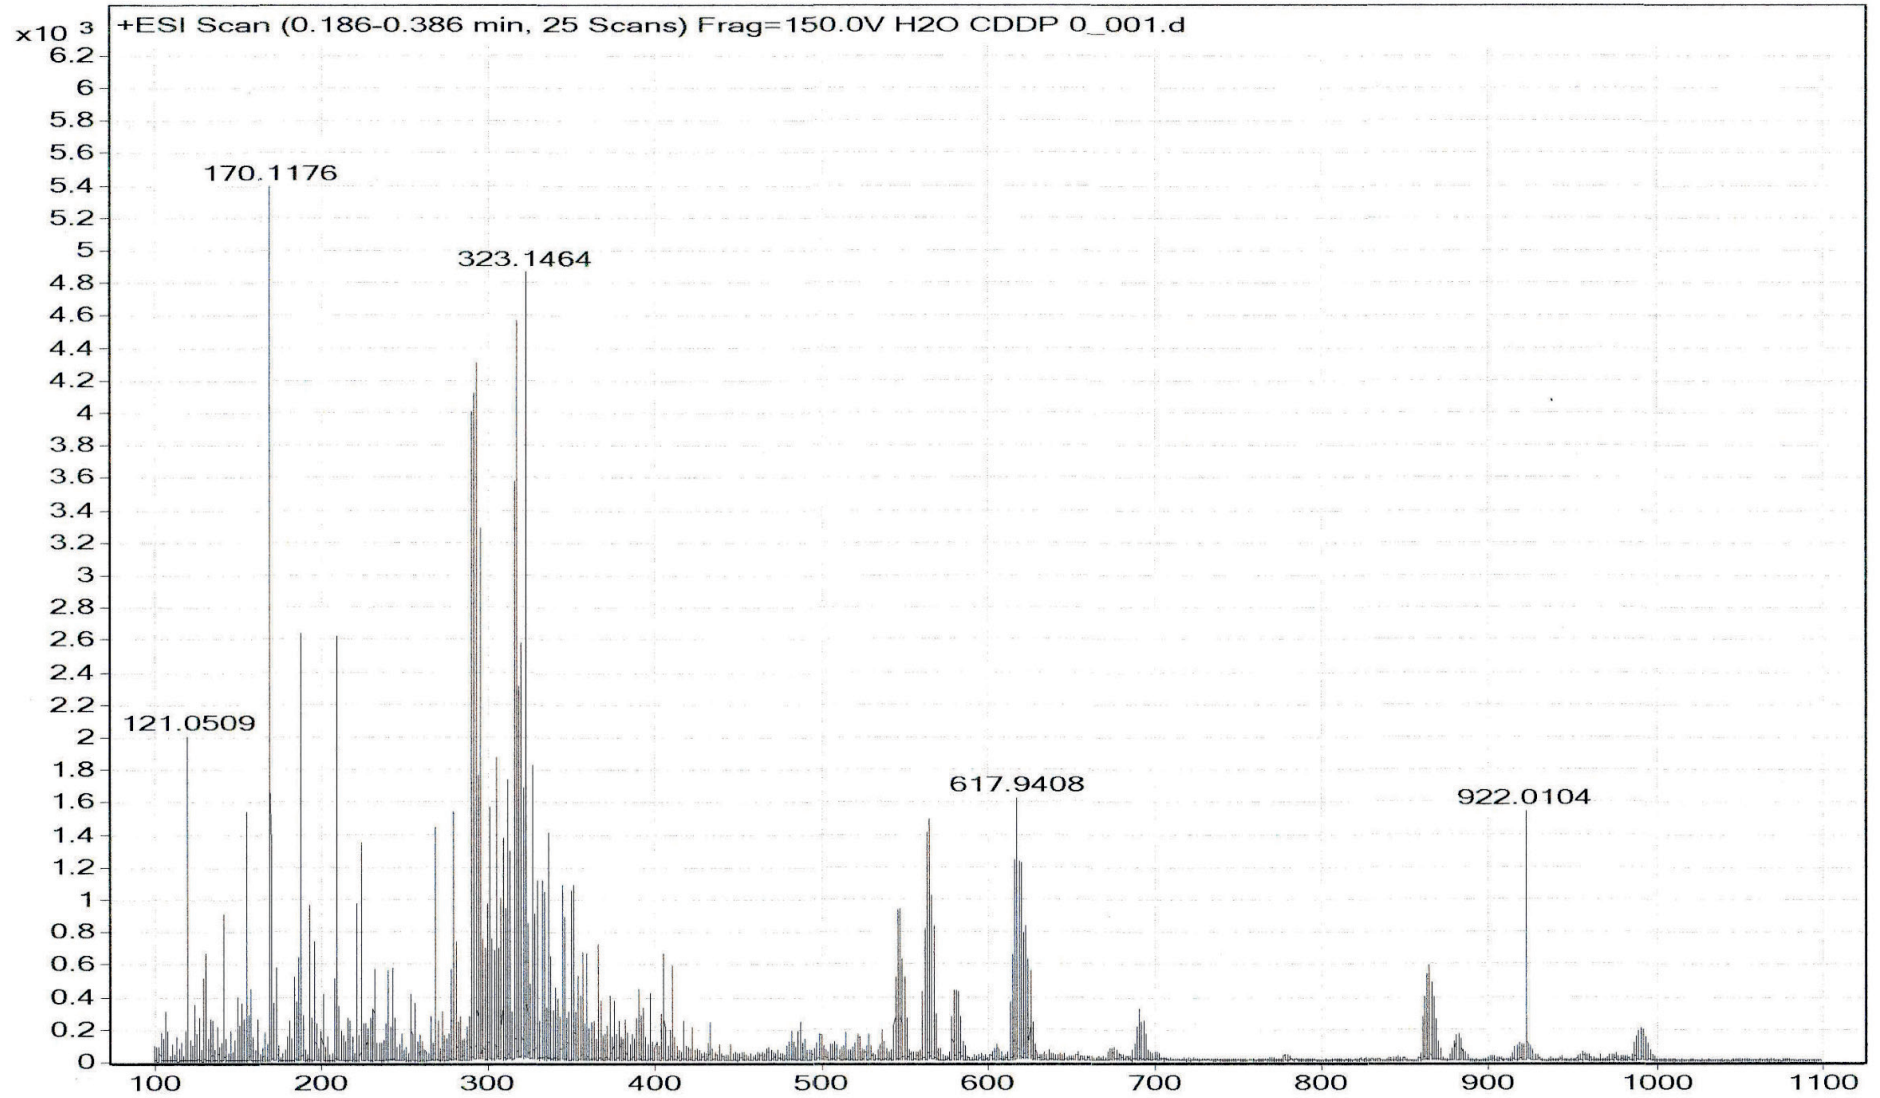

**SUPPLEMENTAL FIGURE S2.** Full-scan high-resolution mass spectrometry (HRMS) spectrum of cisplatin in water without application of electric pulses.

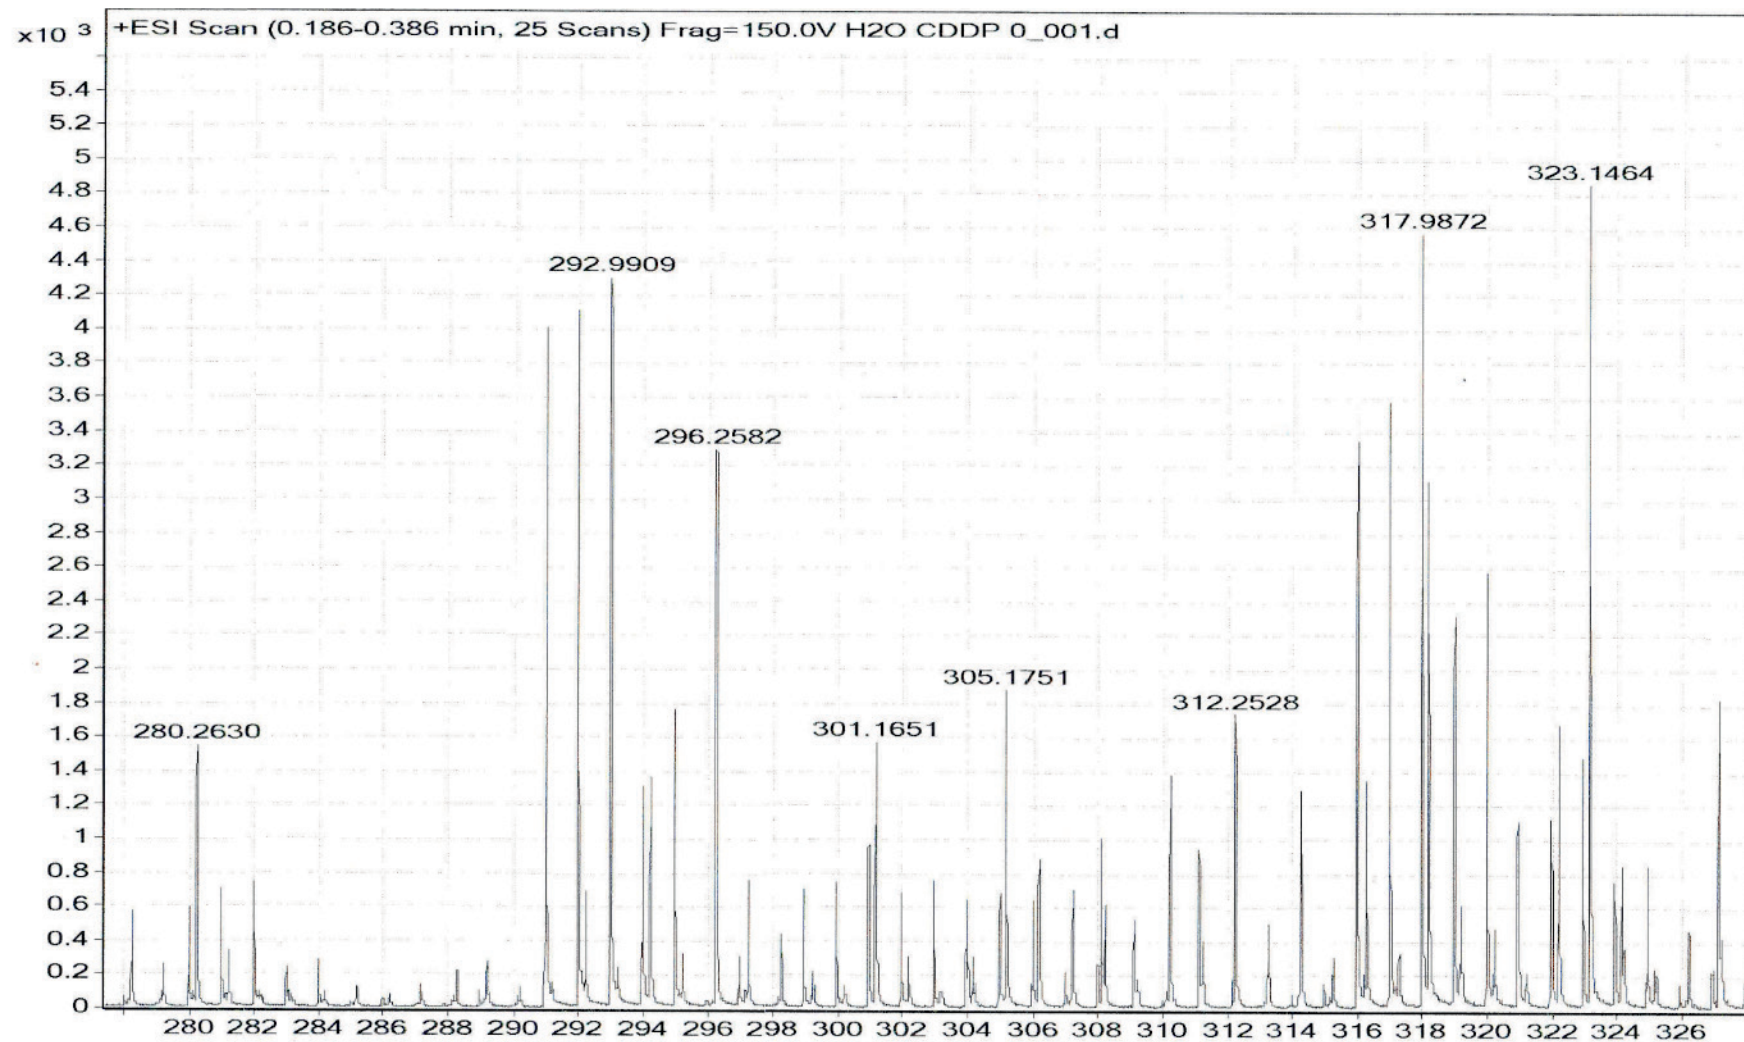

**SUPPLEMENTAL FIGURE S3.** Zoom-scan high-resolution mass spectrometry (HRMS) spectrum ( $m/z$  280–326) of cisplatin in water without application of electric pulses with observed peaks for  $[\text{Pt}(\text{NH}_3)_2(\text{N}_2)\text{Cl}]^+$  ( $m/z$  292.9909) and  $[\text{M}+\text{NH}_4]^+$  ( $m/z$  317.9872).

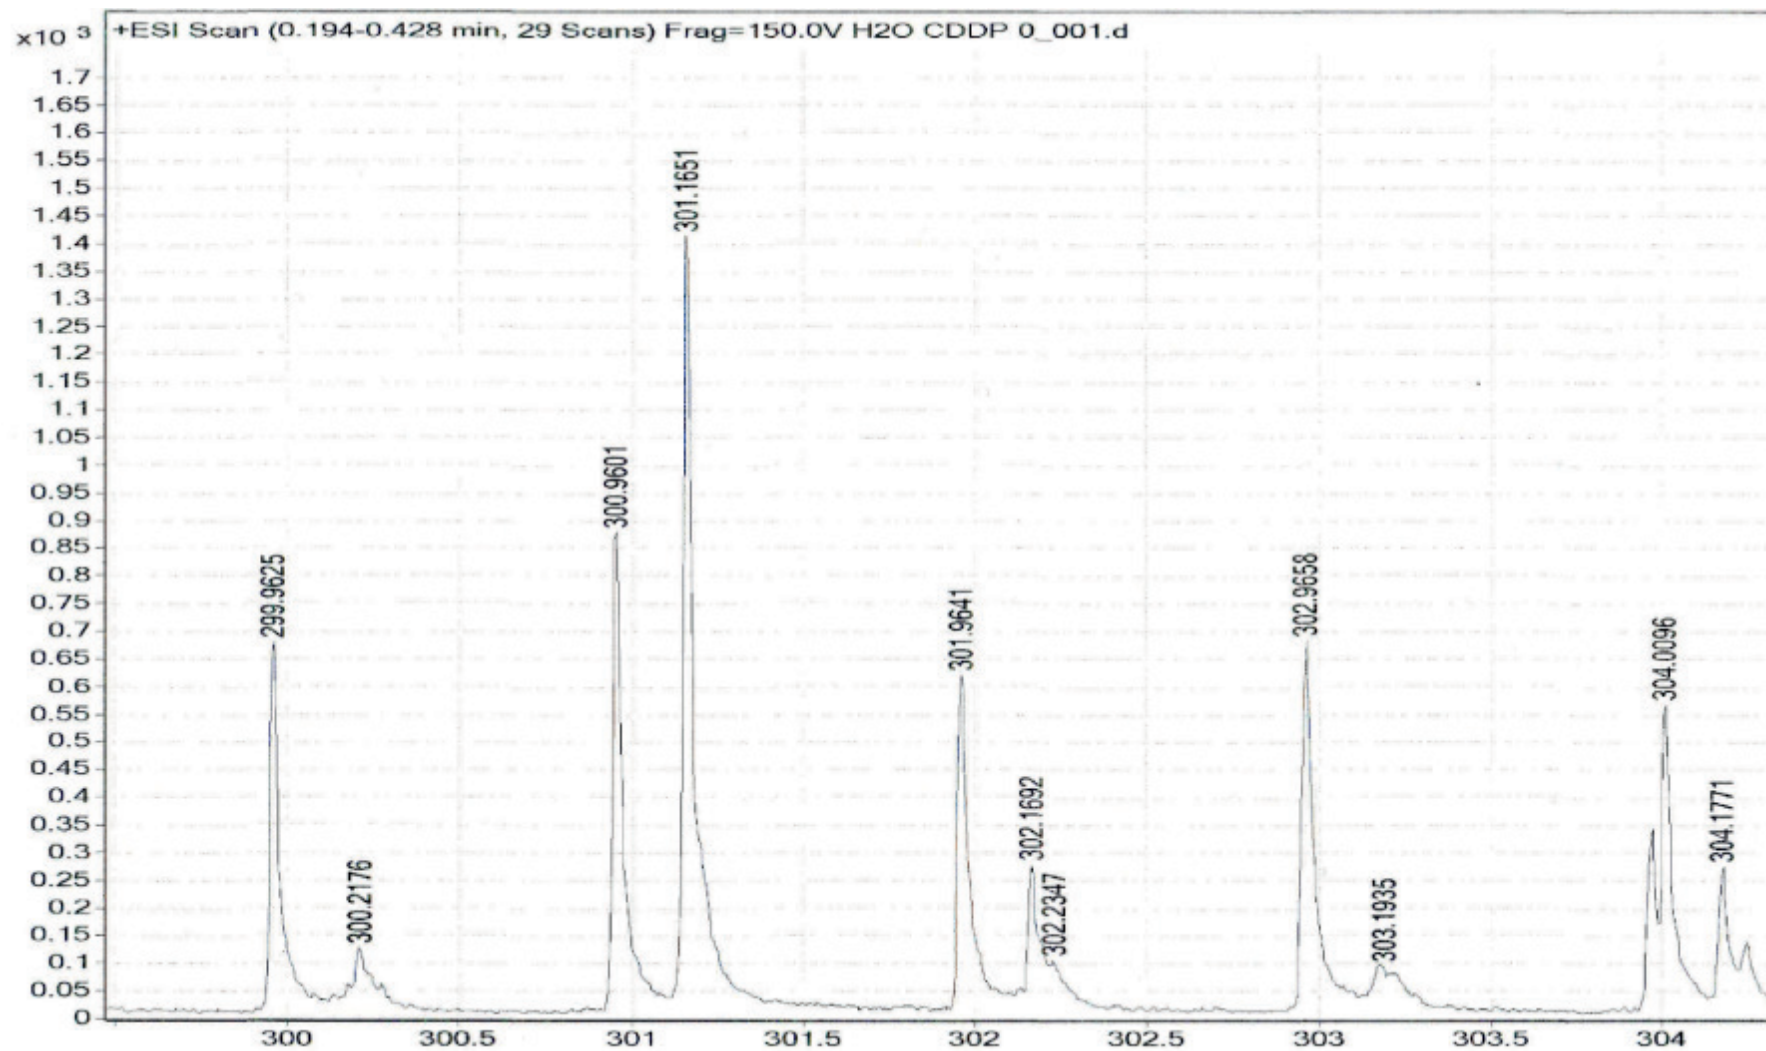

**SUPPLEMENTAL FIGURE S4.** Zoom-scan high-resolution mass spectrometry (HRMS) spectrum ( $m/z$  300–304) of cisplatin in water without application of electric pulses with observed peak for  $[M+H]^+$  ( $m/z$  300.9601).

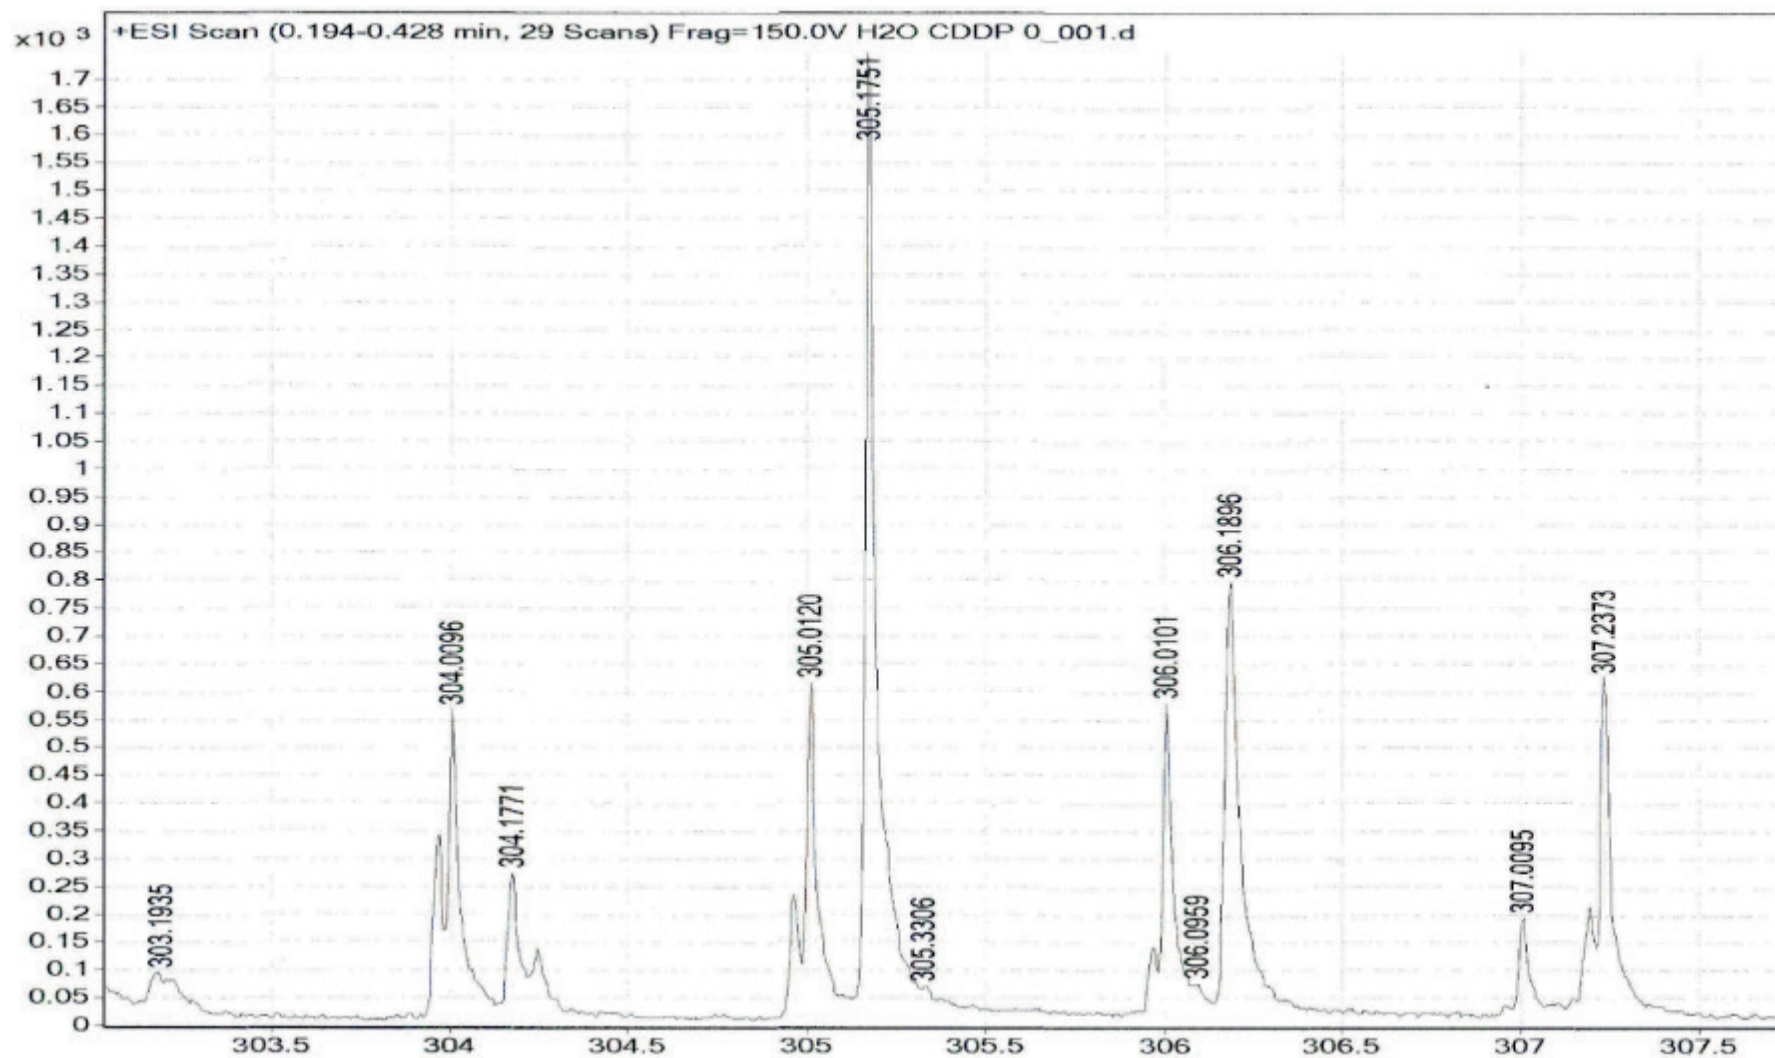

**SUPPLEMENTAL FIGURE S5.** Zoom-scan high-resolution mass spectrometry (HRMS) spectrum ( $m/z$  303–307) of cisplatin in water without application of electric pulses with observed peak for  $[\text{Pt}(\text{NH}_3)_2(\text{CH}_3\text{CN})\text{Cl}]^+$  ( $m/z$  306.0101).

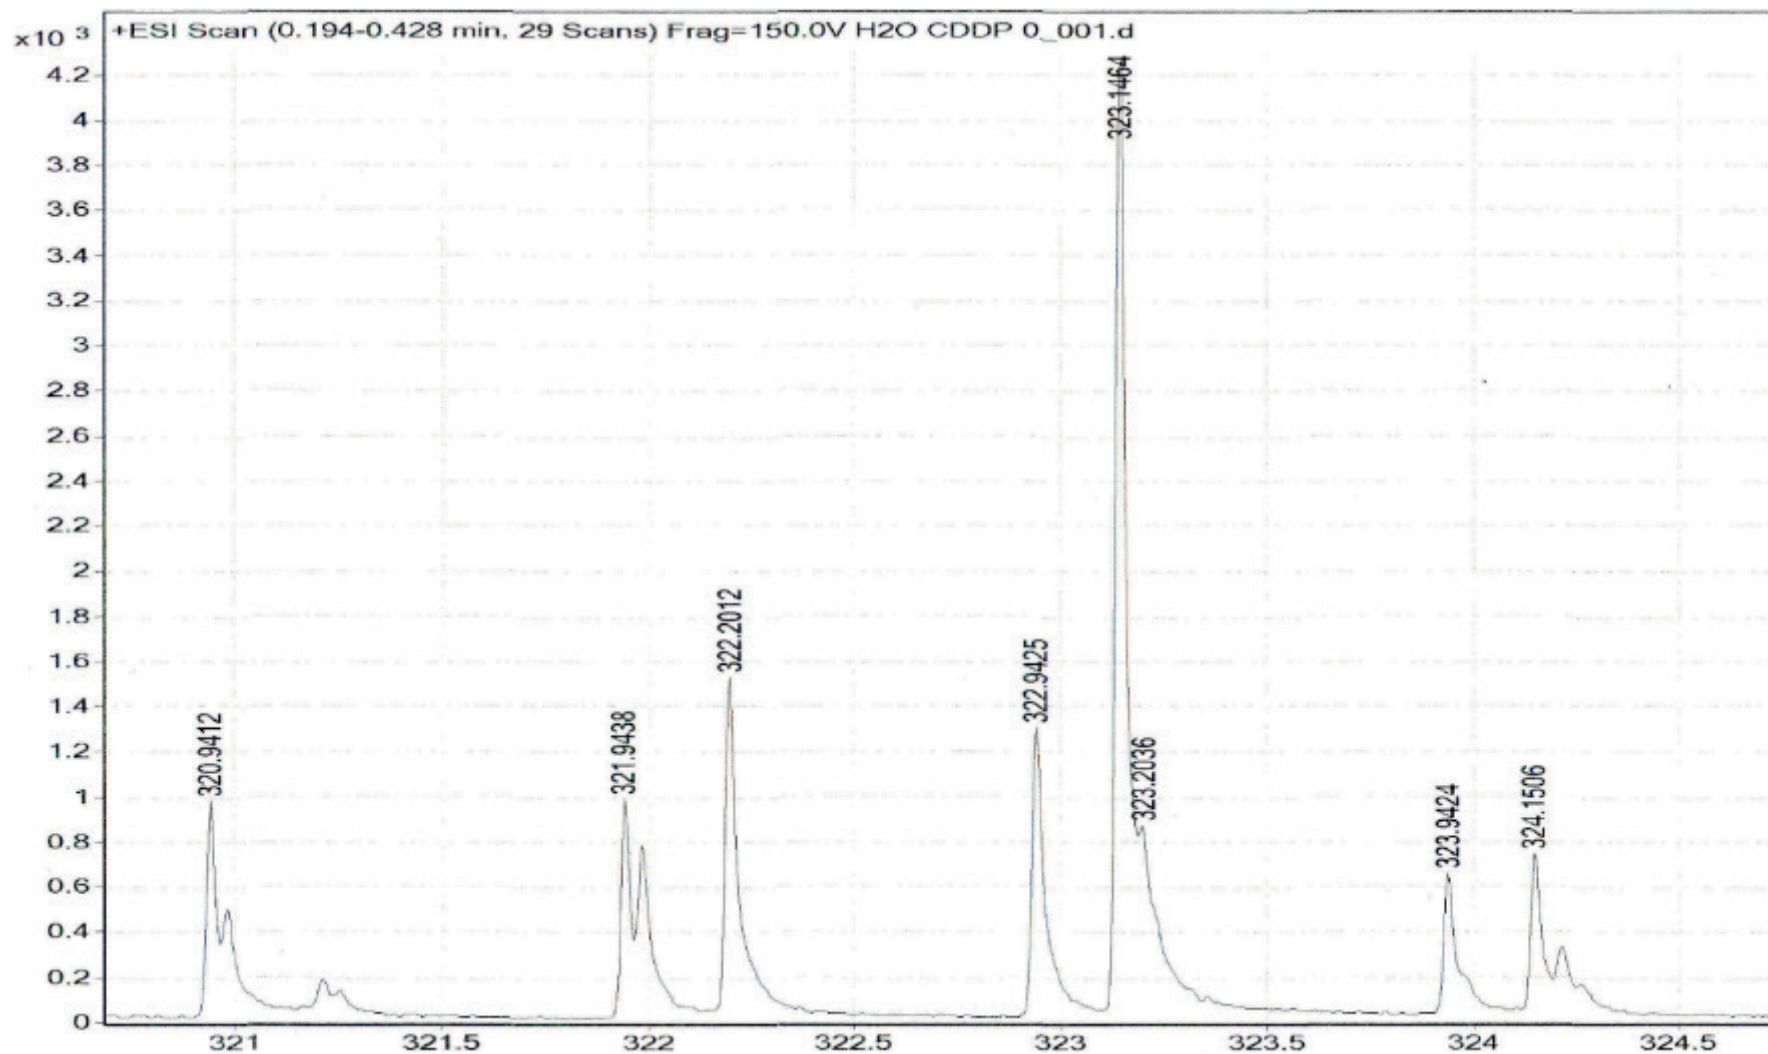

**SUPPLEMENTAL FIGURE S6.** Zoom-scan high-resolution mass spectrometry (HRMS) spectrum ( $m/z$  321–324) of cisplatin in water without application of electric pulses with observed peak for  $[M+Na]^+$  ( $m/z$  322.9425).

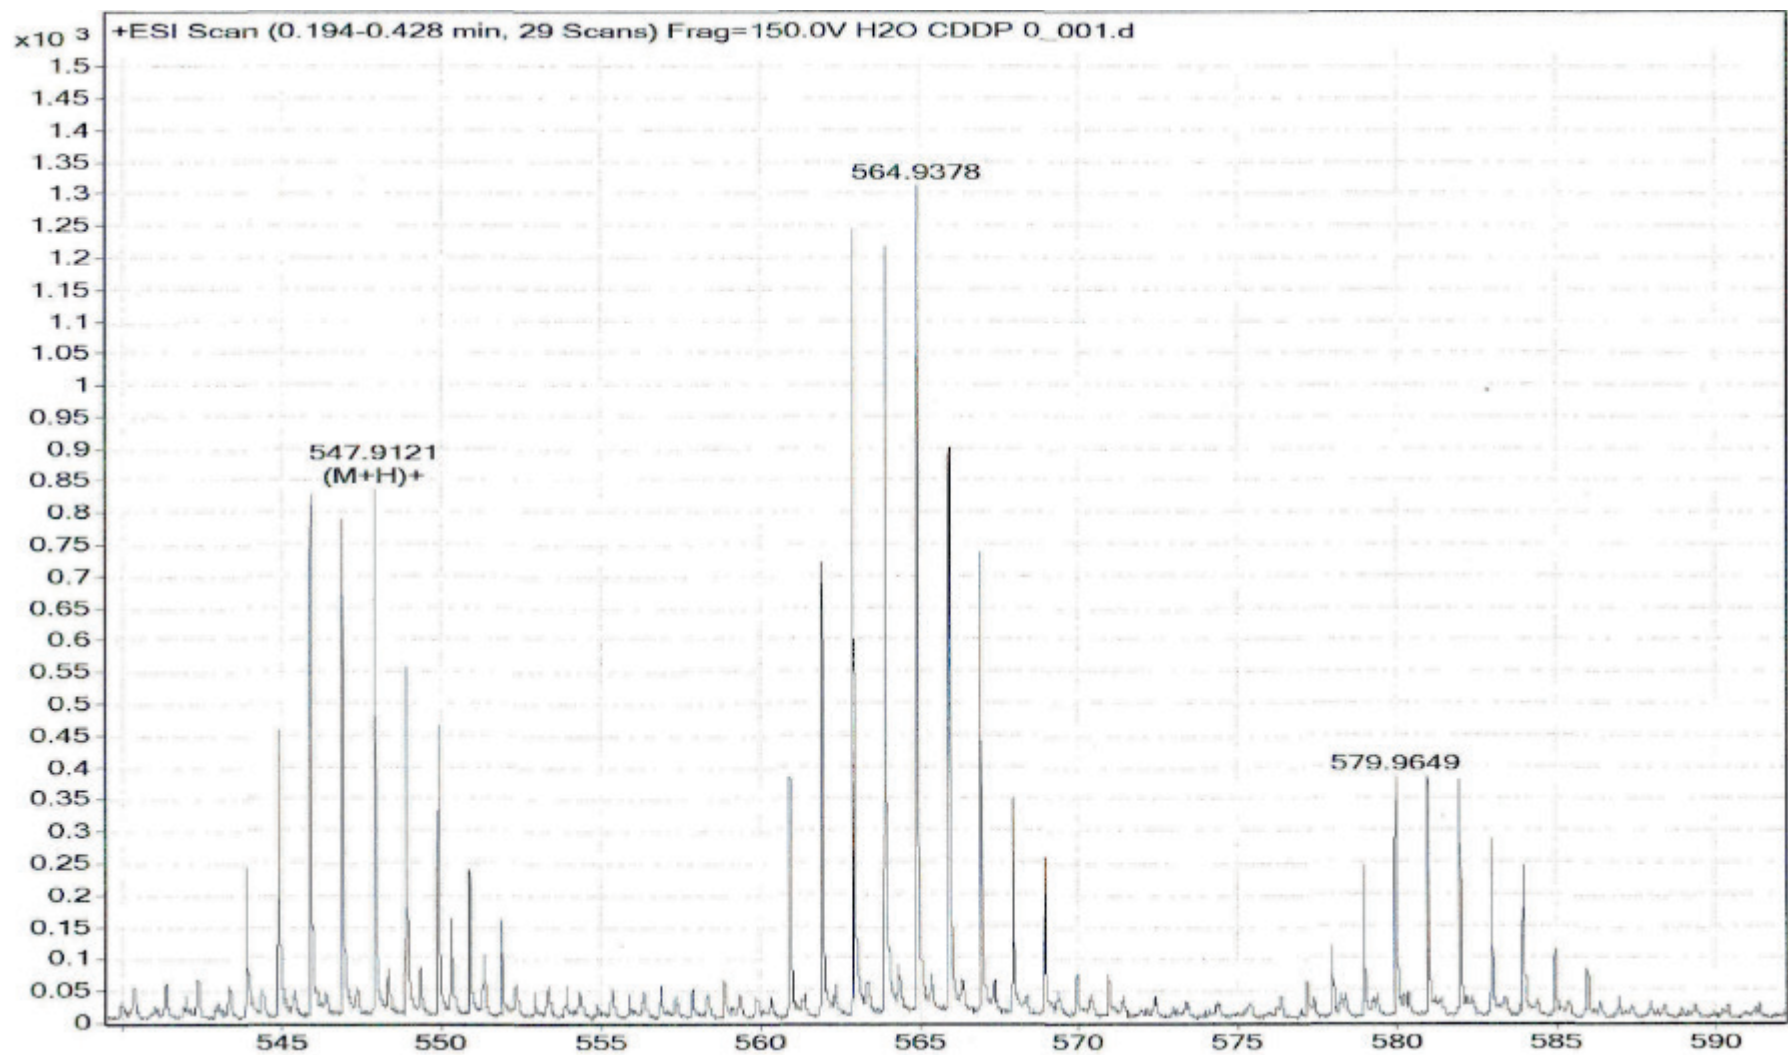

**SUPPLEMENTAL FIGURE S7.** Zoom-scan high-resolution mass spectrometry (HRMS) spectrum ( $m/z$  540–590) of cisplatin in water without application of electric pulses with identified peaks for  $[\text{Pt}(\text{NH}_3)_2\text{Cl}_2\cdot\text{Pt}(\text{NH}_3)\text{Cl}]^+$  ( $m/z$  547.9121) and  $[\text{Pt}(\text{NH}_3)_2\text{Cl}_2\cdot\text{Pt}(\text{NH}_3)_2\text{Cl}]^+$  ( $m/z$  564.9378).

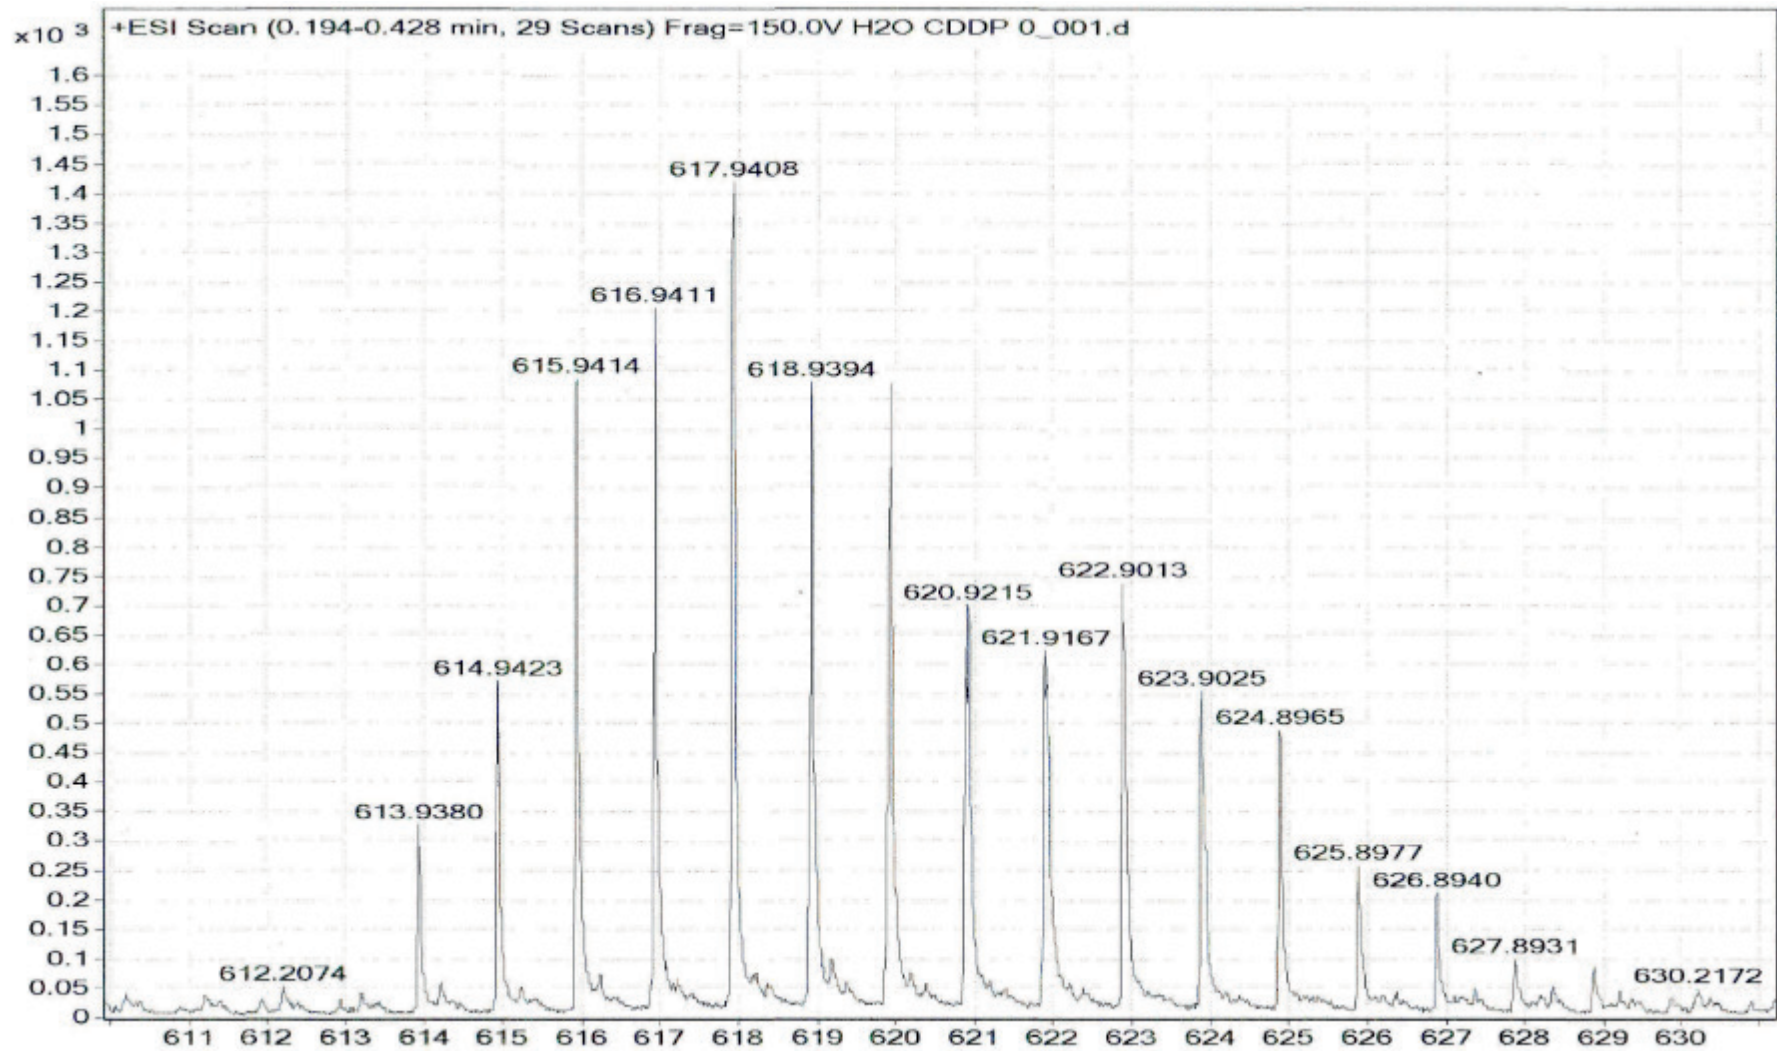

**SUPPLEMENTAL FIGURE S8.** Zoom-scan high-resolution mass spectrometry (HRMS) spectrum ( $m/z$  610–630) of cisplatin in water without application of electric pulses with observed peak for  $[2M+NH_4]^+$  ( $m/z$  617.9408).



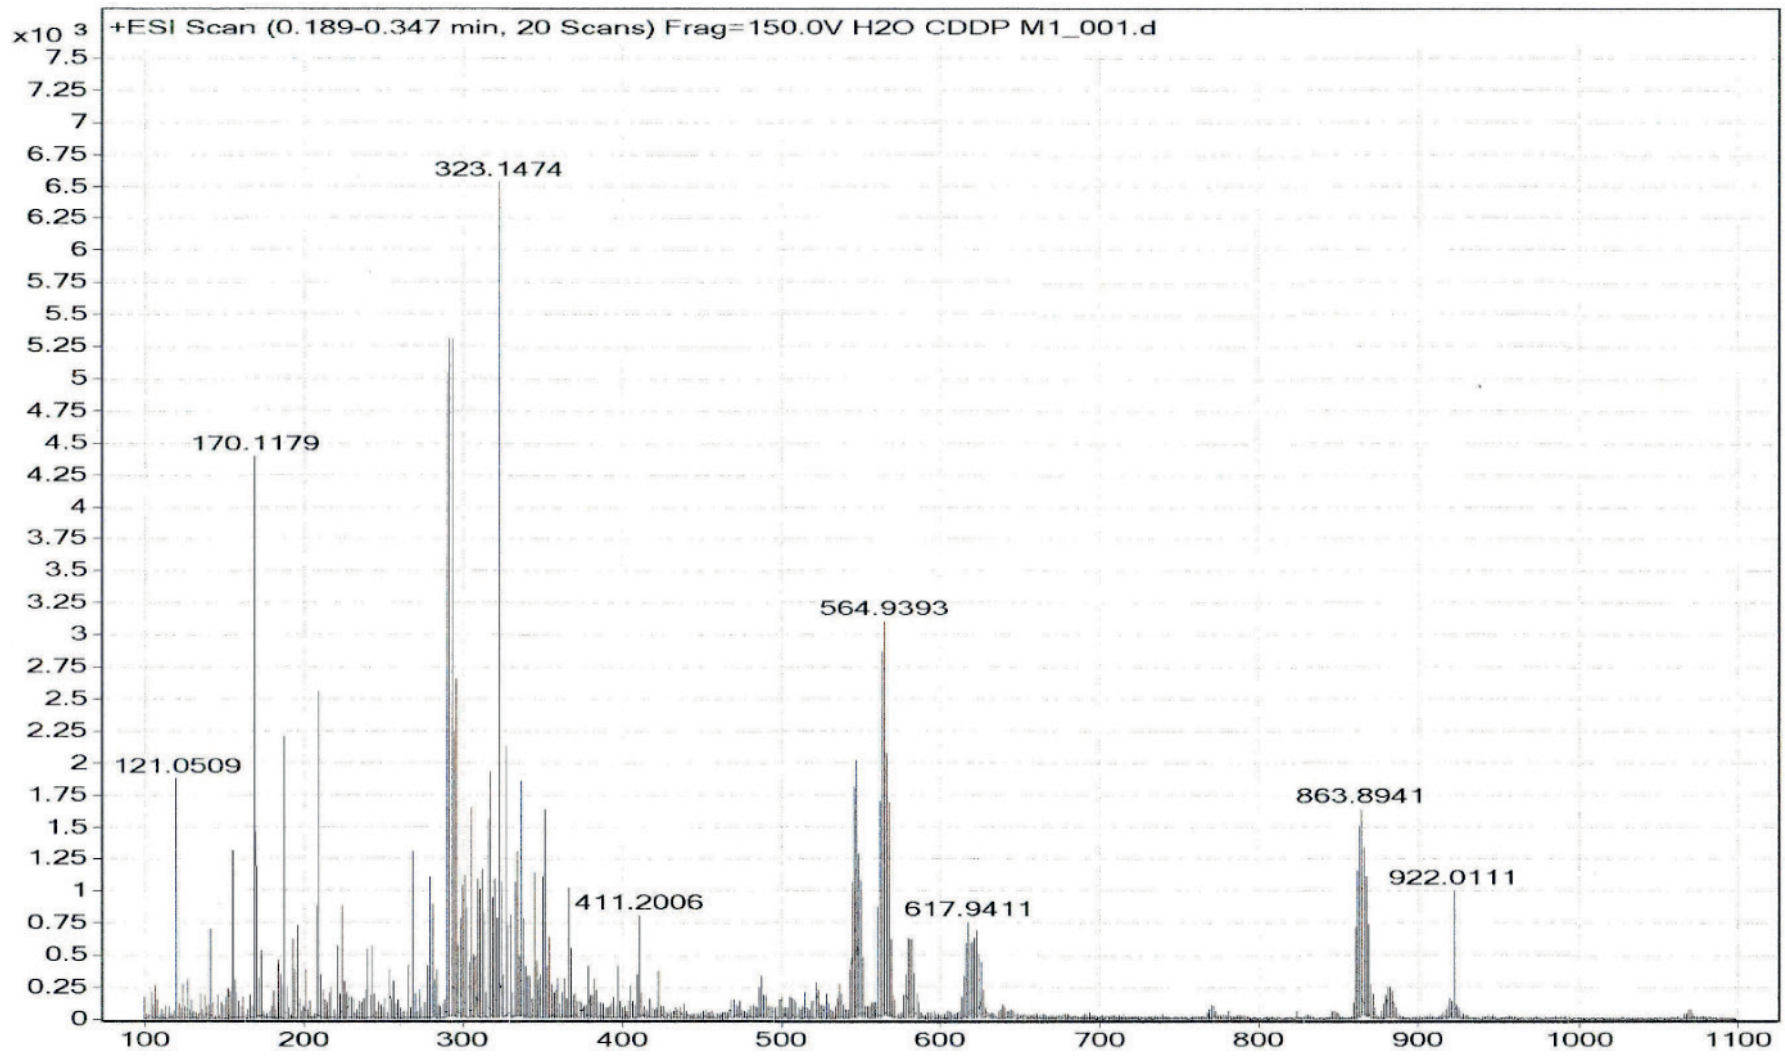

**SUPPLEMENTAL FIGURE S9.** Full-scan high-resolution mass spectrometry (HRMS) spectrum of cisplatin in water after microsecond pulses application.

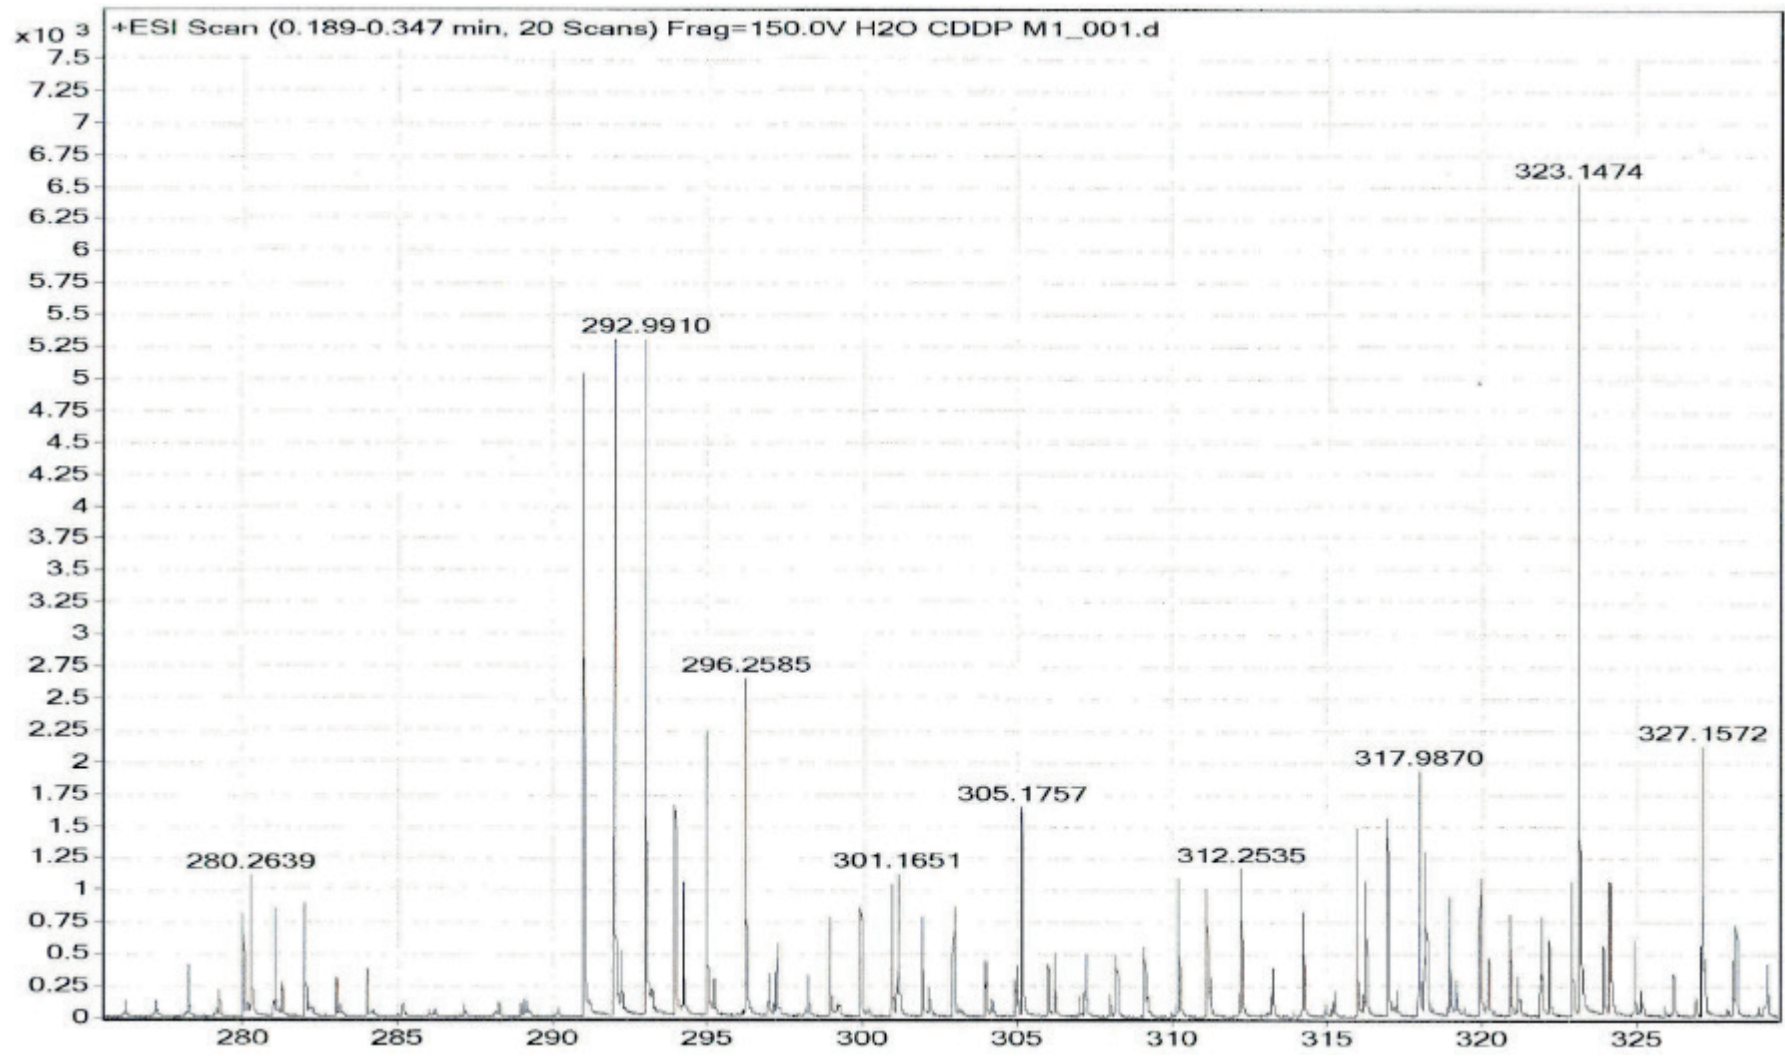

**SUPPLEMENTAL FIGURE S10.** Zoom-scan high-resolution mass spectrometry (HRMS) spectrum ( $m/z$  275–330) of cisplatin in water after microsecond pulses application.

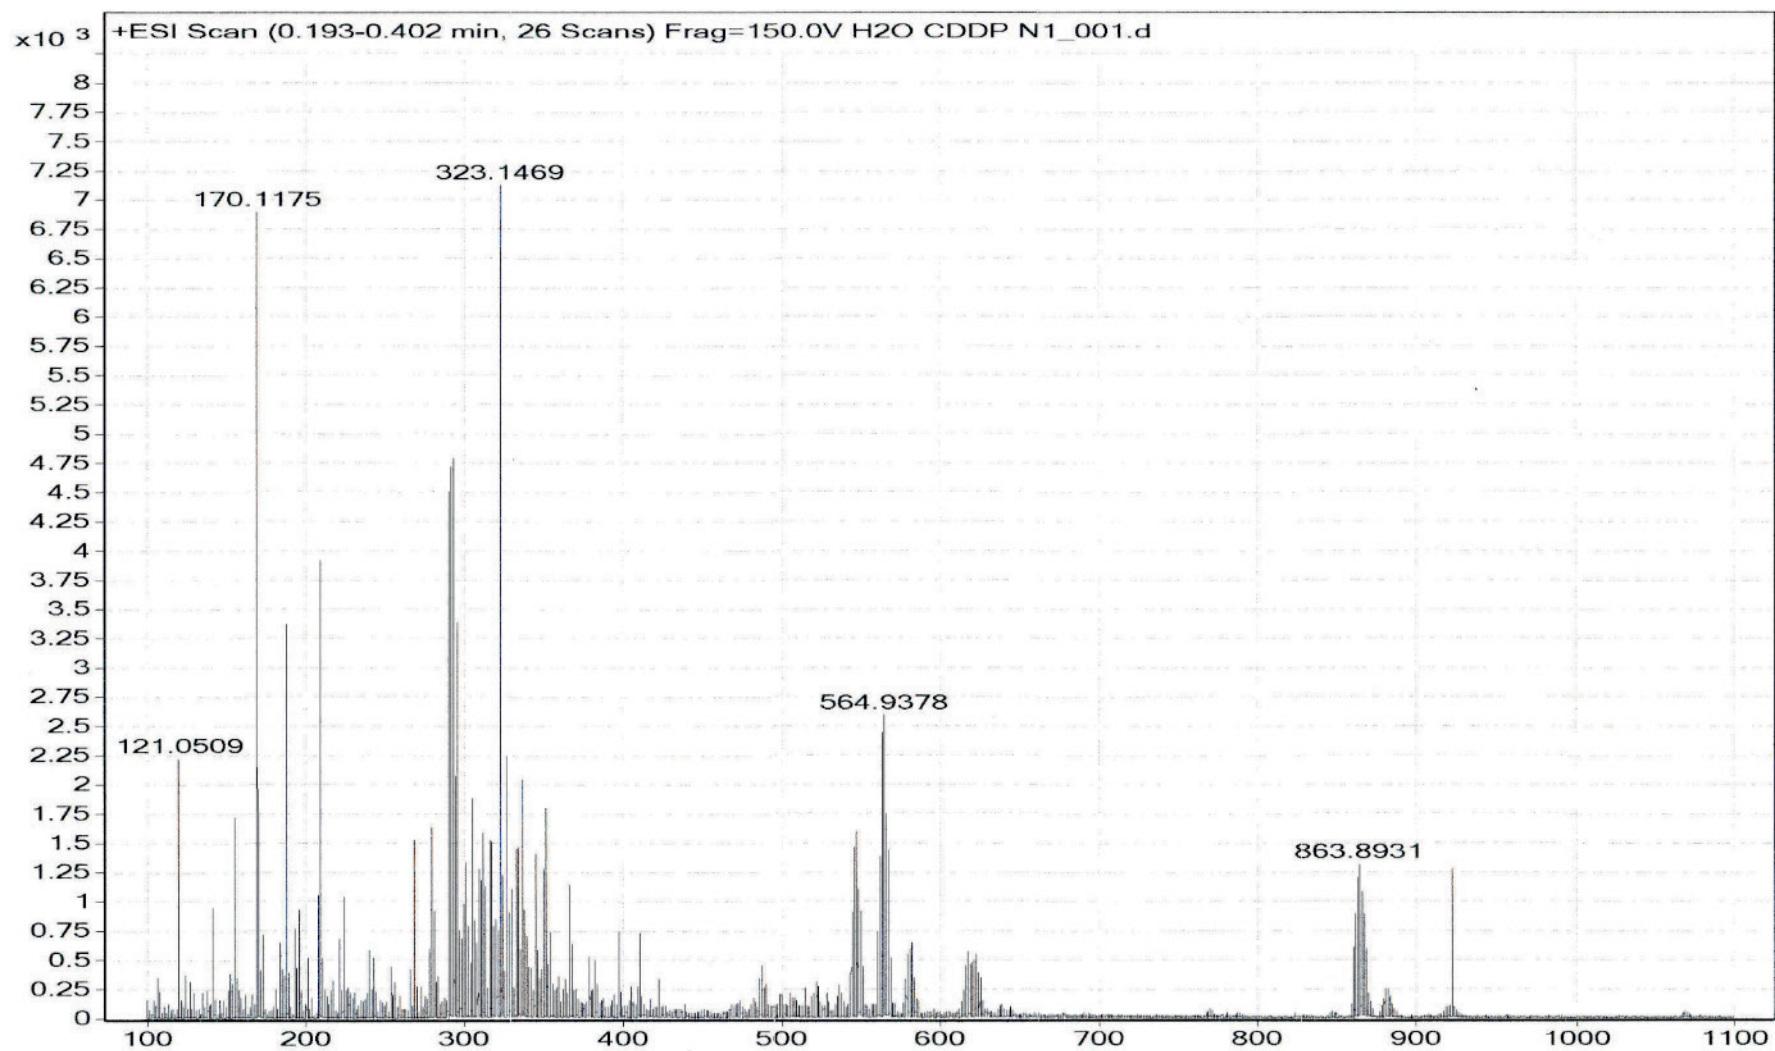

**SUPPLEMENTAL FIGURE S11.** Full-scan high-resolution mass spectrometry (HRMS) spectrum of cisplatin in water after nanosecond pulses application.

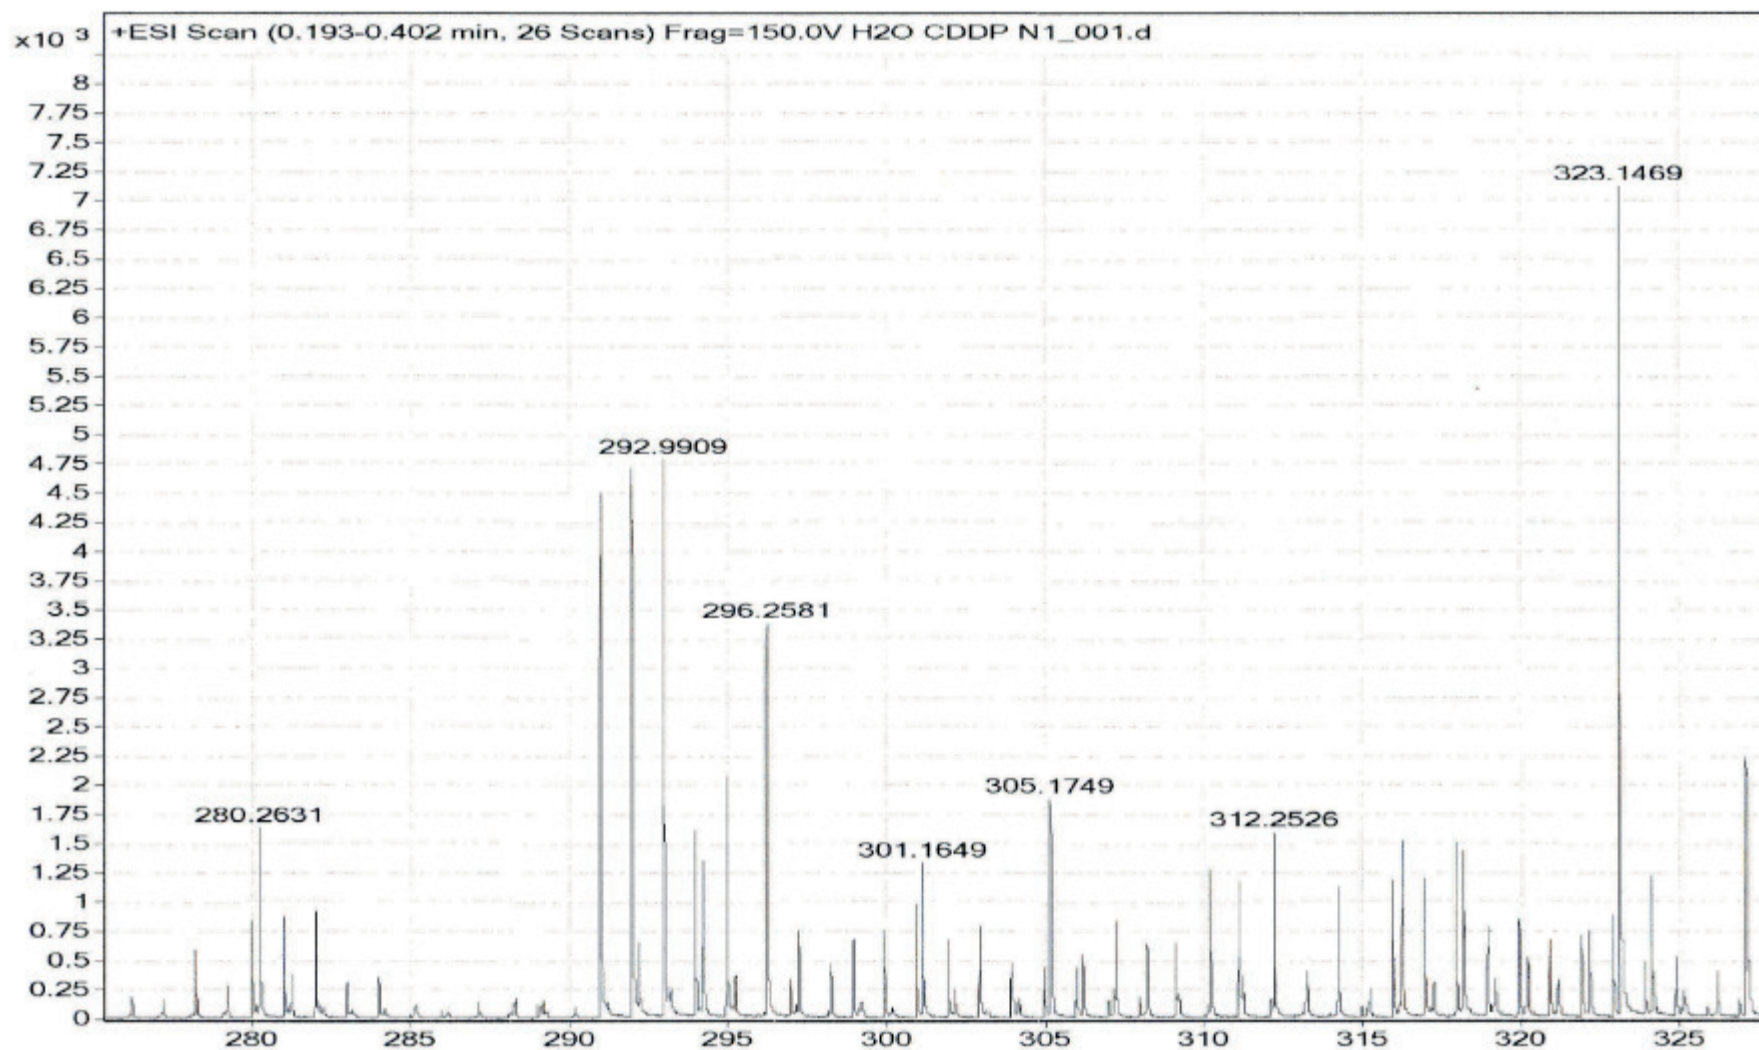

**SUPPLEMENTAL FIGURE S12.** Zoom-scan high-resolution mass spectrometry (HRMS) spectrum (*m/z* 275–330) of cisplatin in water after nanosecond pulses application.

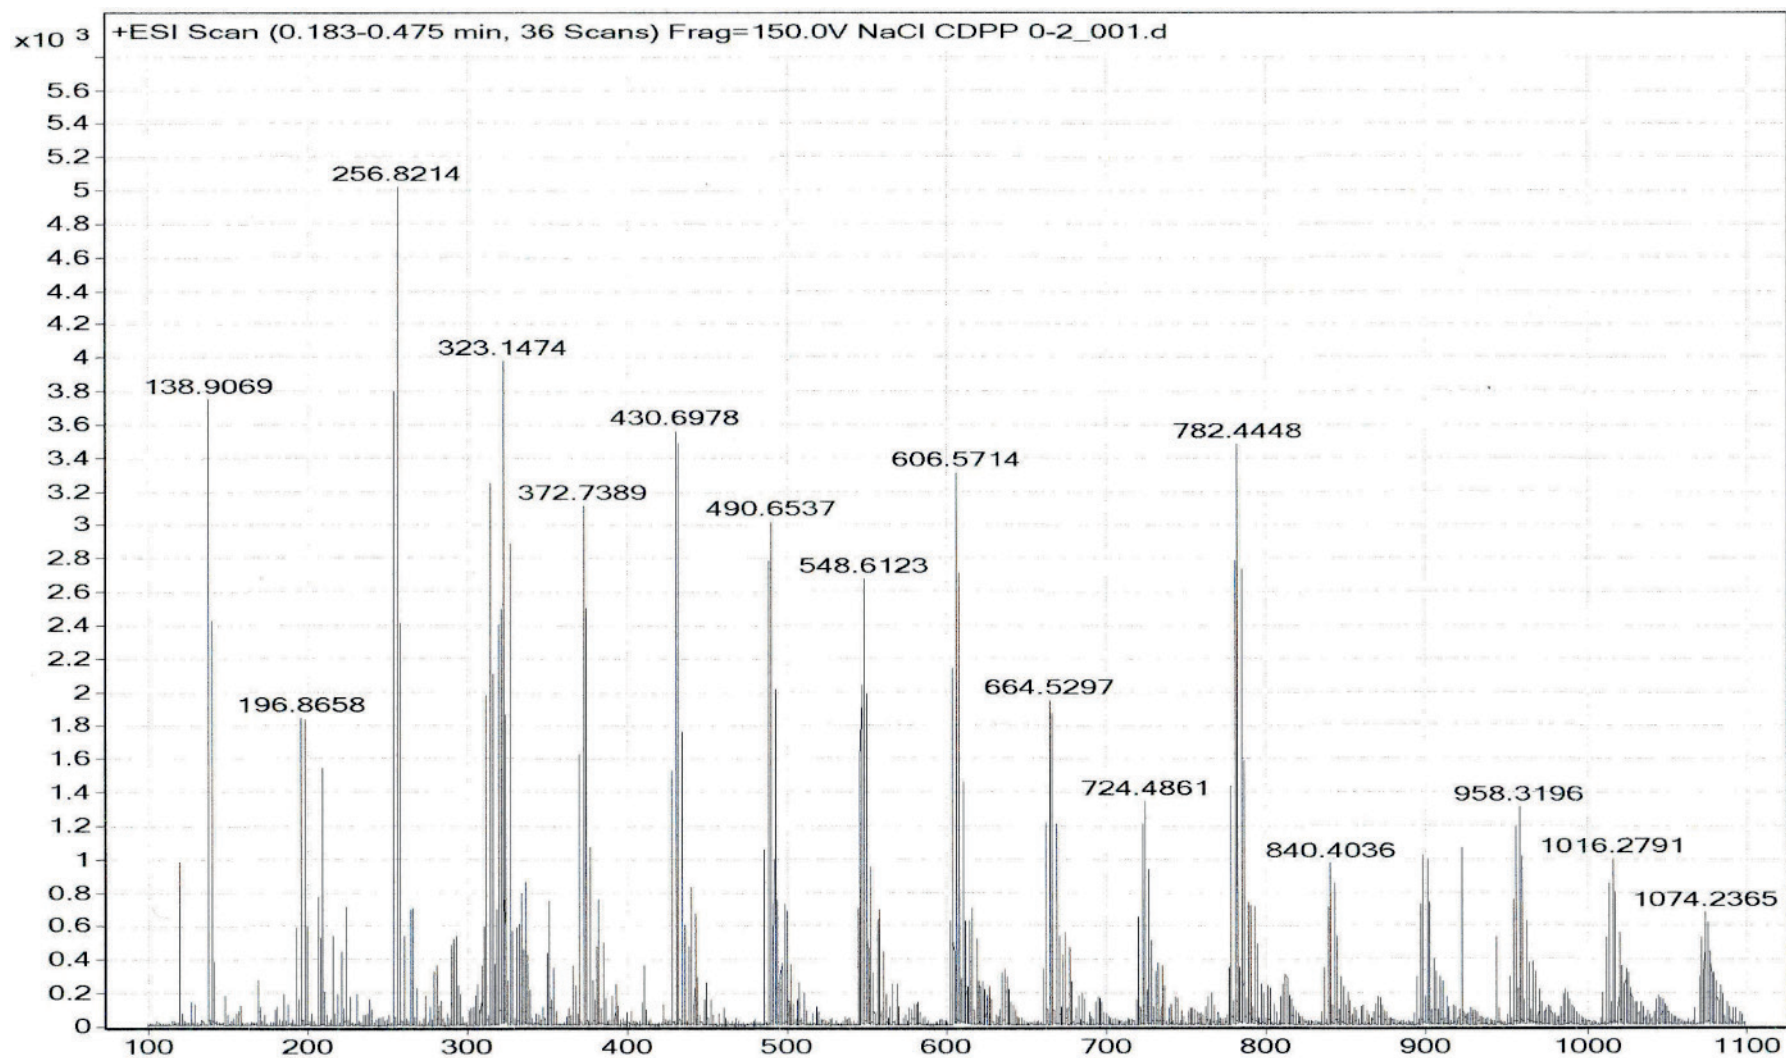

**SUPPLEMENTAL FIGURE S13.** Full-scan high-resolution mass spectrometry (HRMS) spectrum of cisplatin in saline without application of electric pulses.

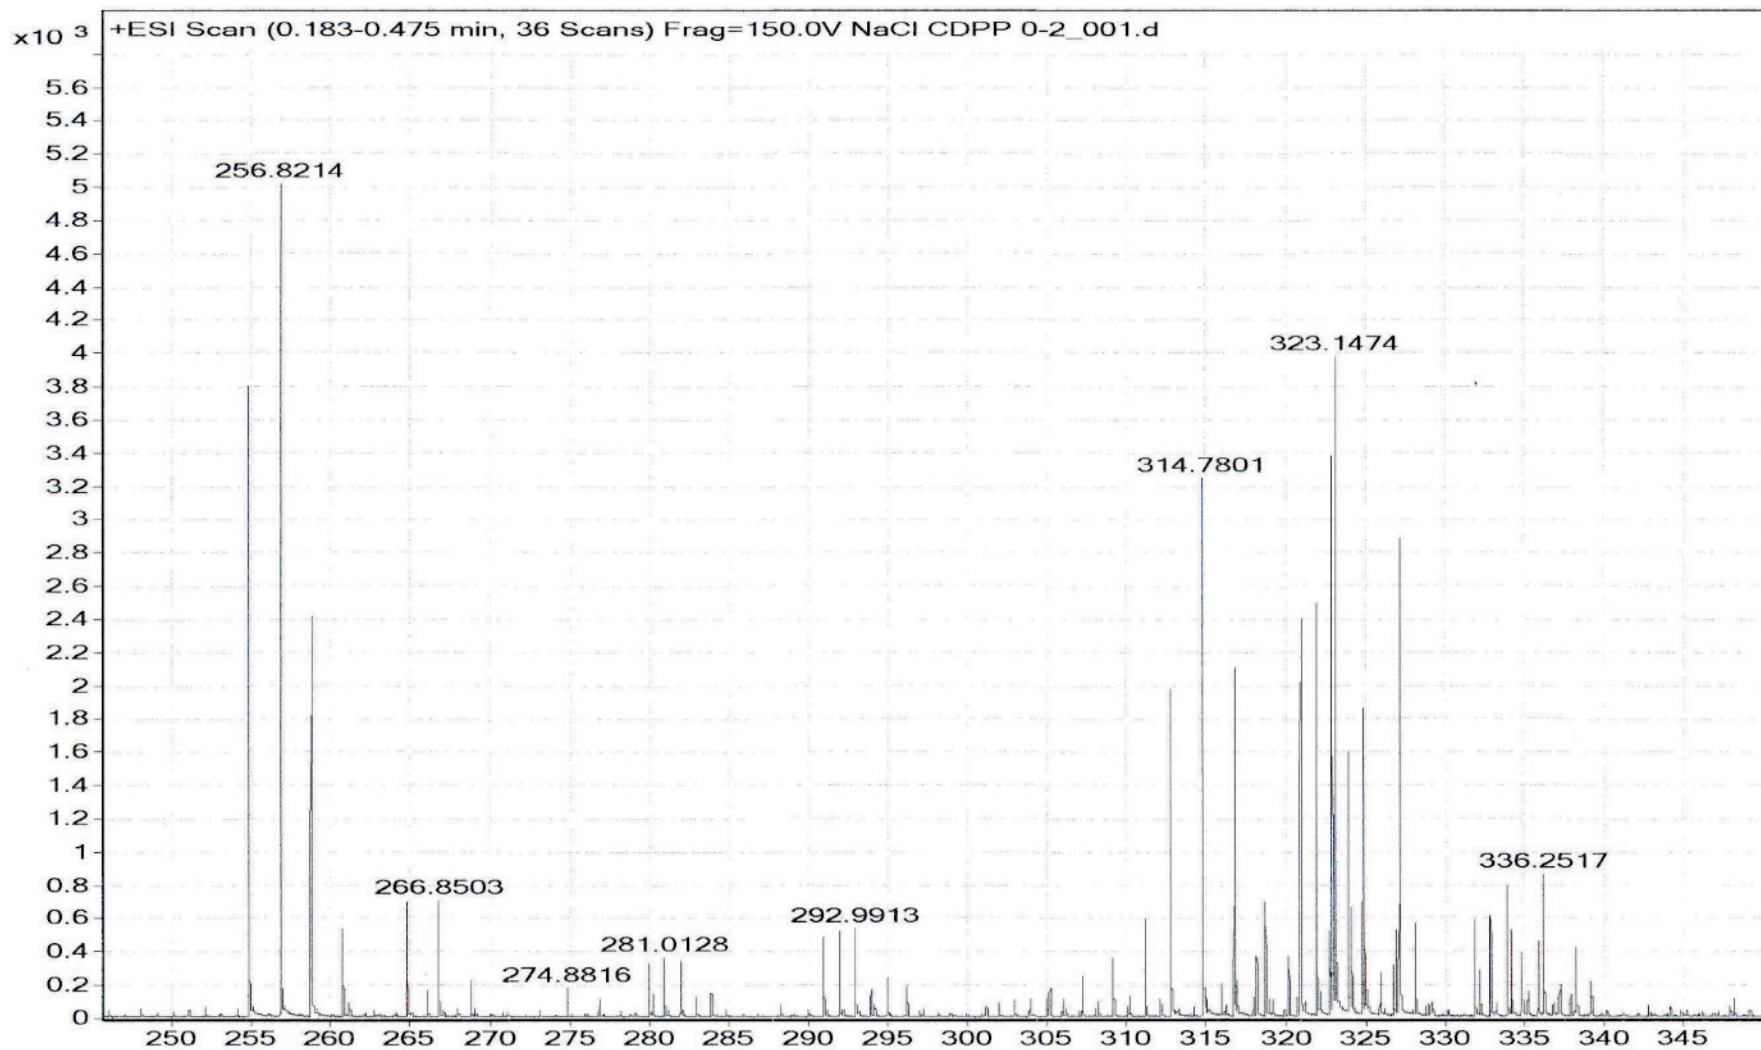

**SUPPLEMENTAL FIGURE S14.** Zoom-scan high-resolution mass spectrometry (HRMS) spectrum ( $m/z$  250–345) of cisplatin in saline without application of electric pulses.

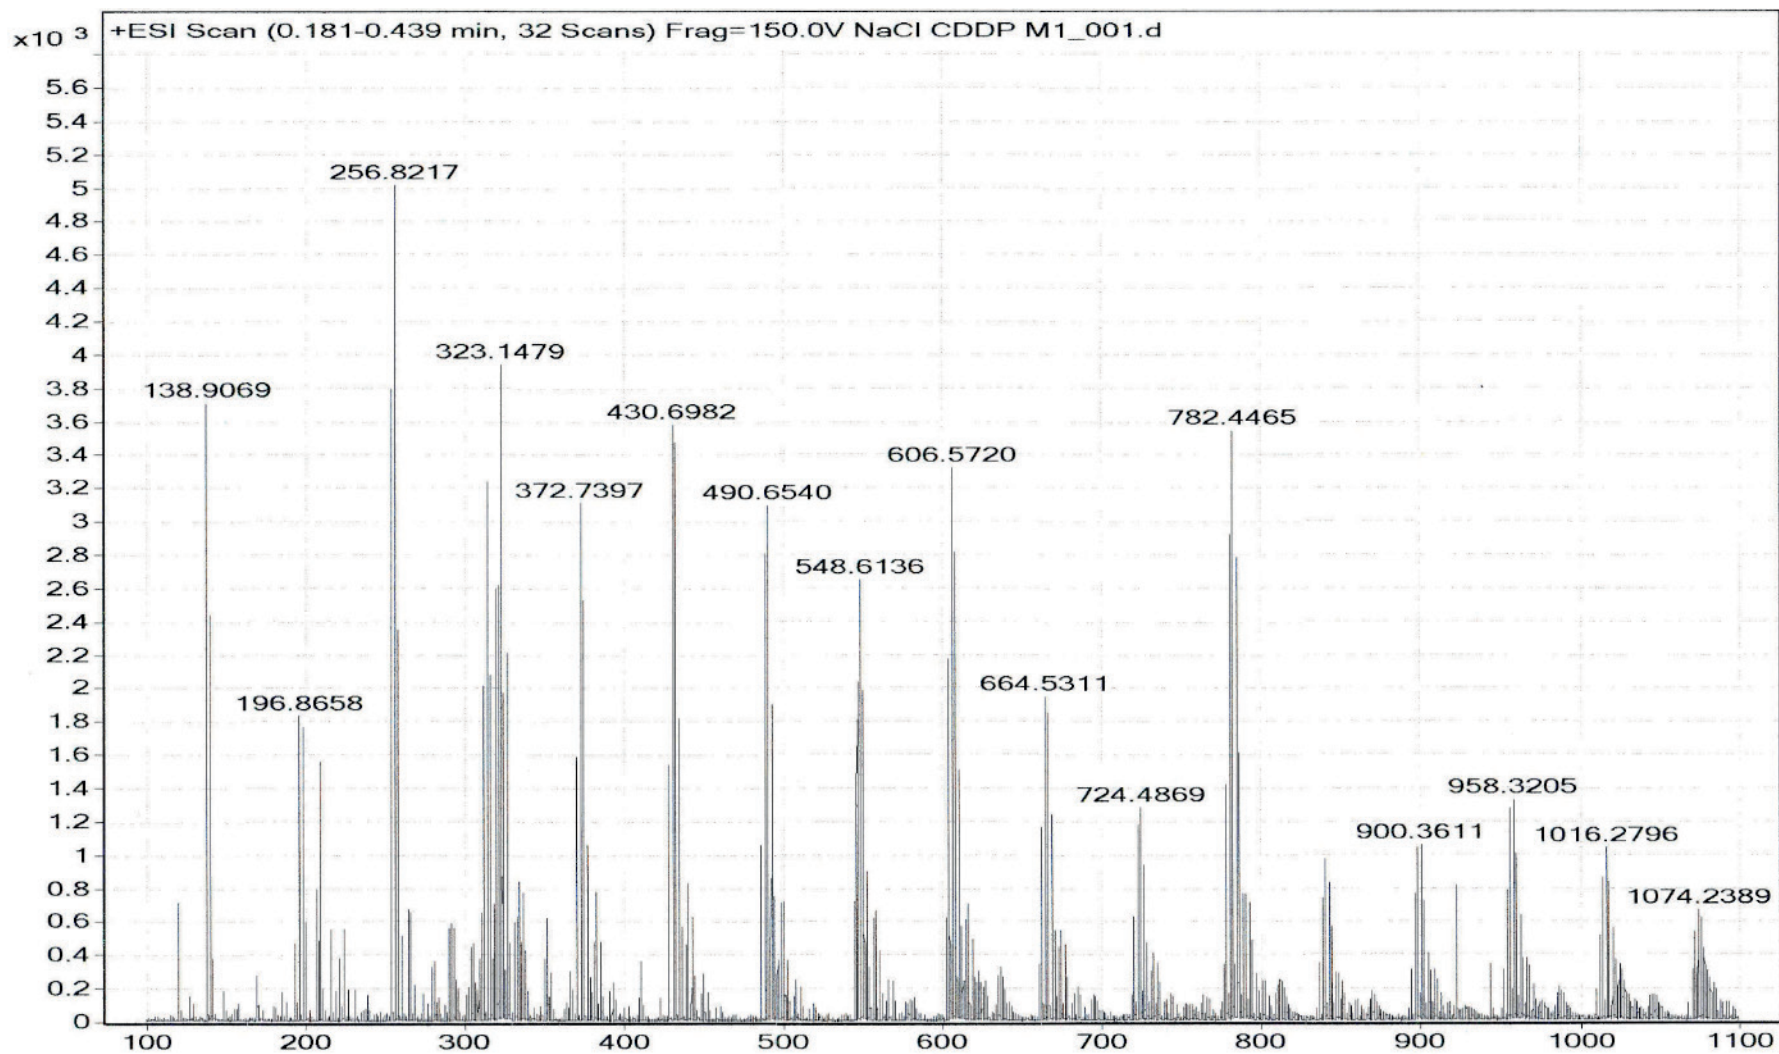

**SUPPLEMENTAL FIGURE S15.** Full-scan high-resolution mass spectrometry (HRMS) spectrum of cisplatin in saline after microsecond pulses.

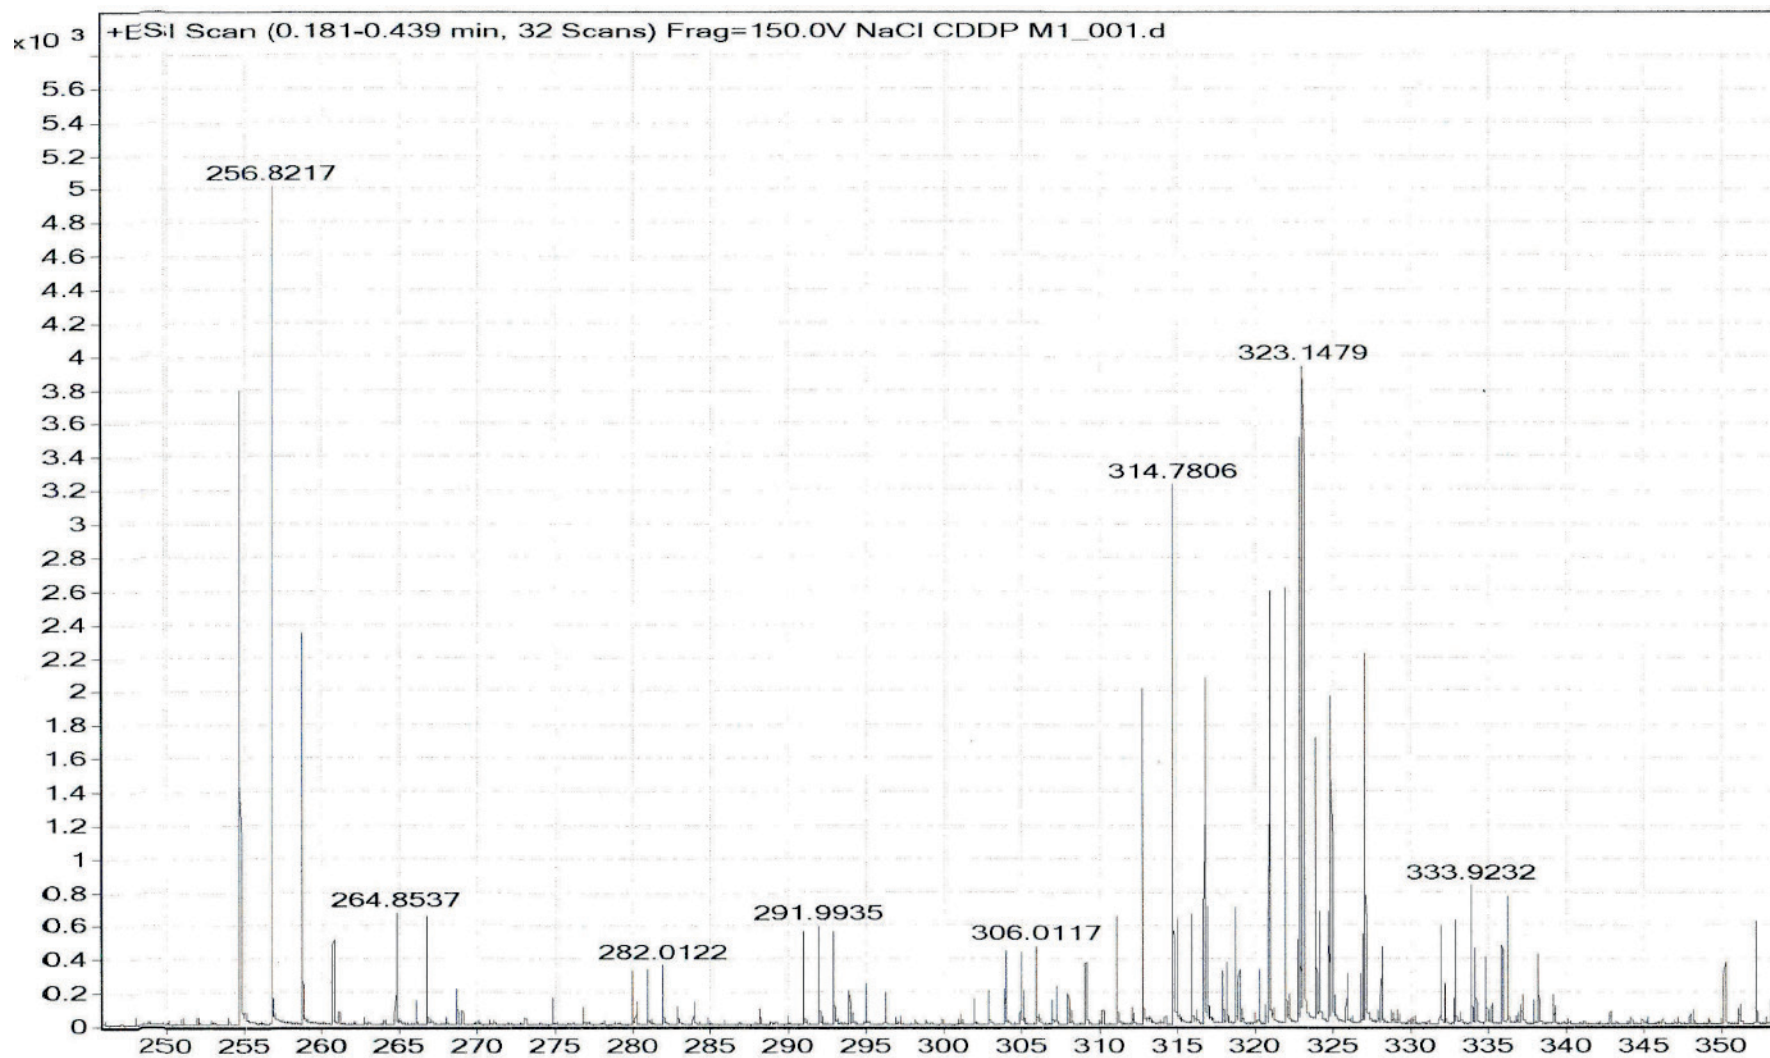

**SUPPLEMENTAL FIGURE S16.** Zoom-scan high-resolution mass spectrometry (HRMS) spectrum (*m/z* 250–350) of cisplatin in saline after microsecond pulses application.



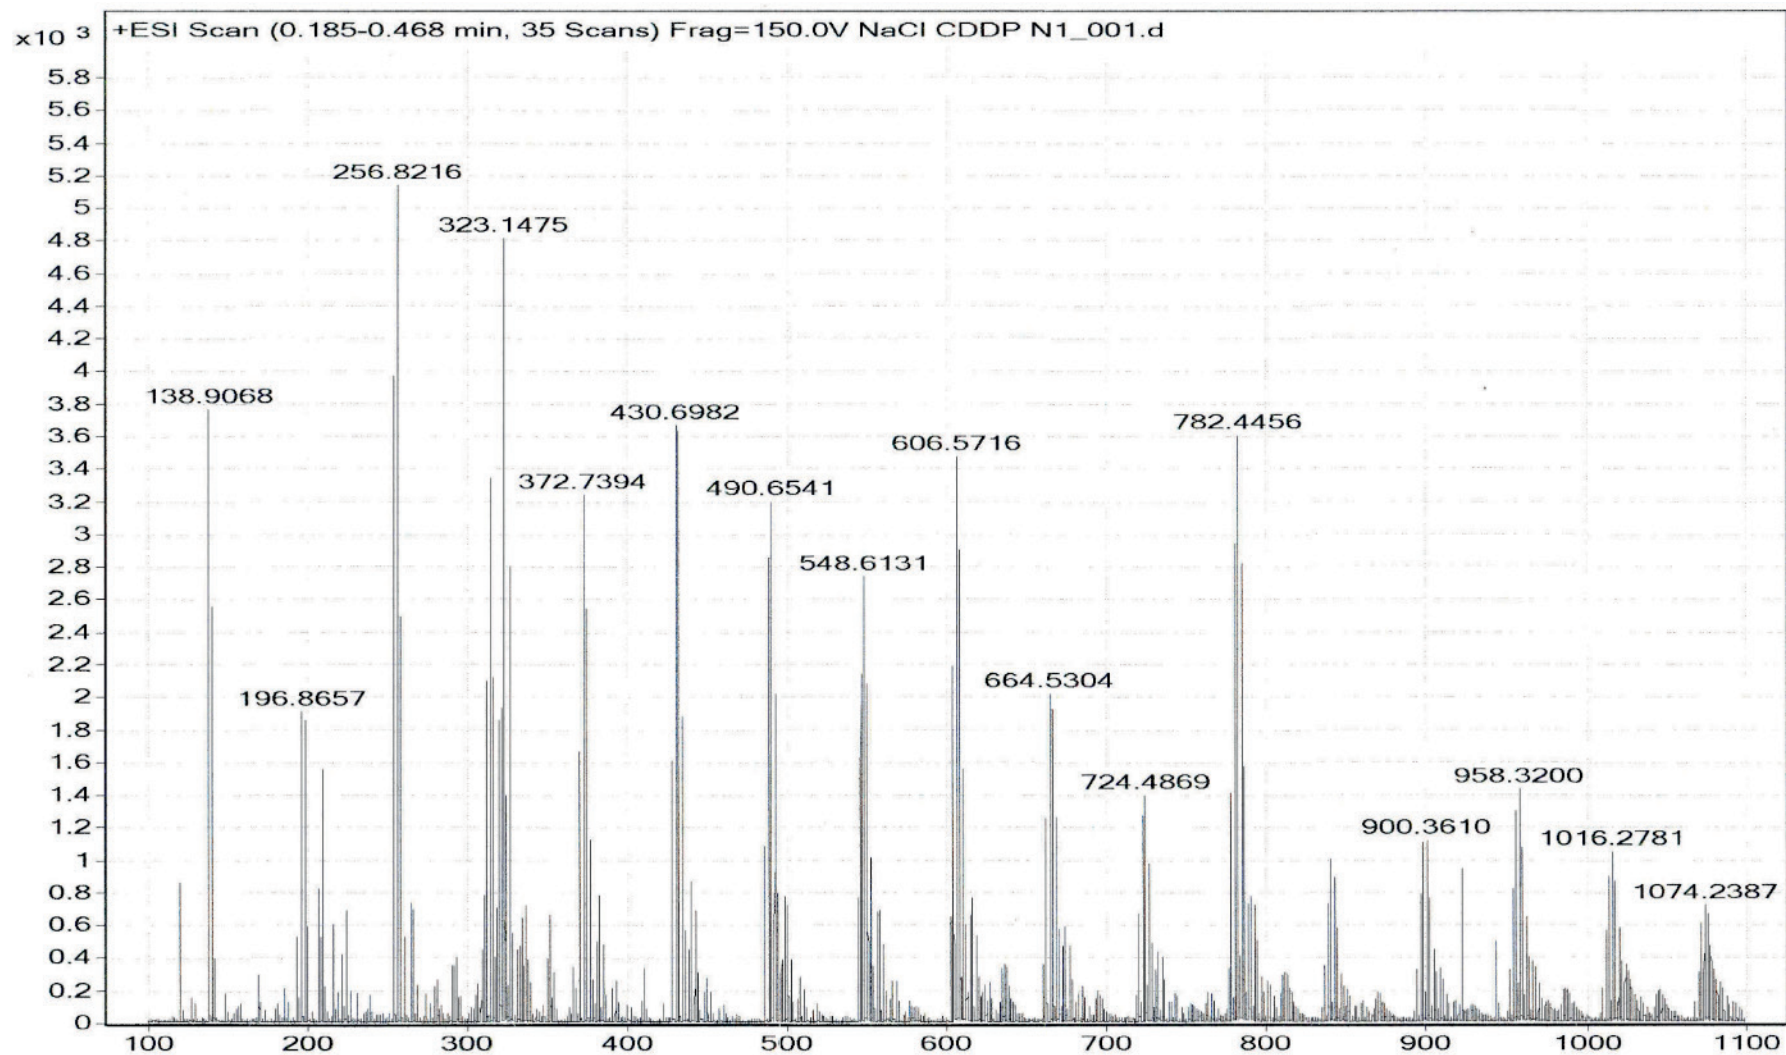

**SUPPLEMENTAL FIGURE S17.** Full-scan high-resolution mass spectrometry (HRMS) spectrum of cisplatin in saline after nanosecond pulses application.

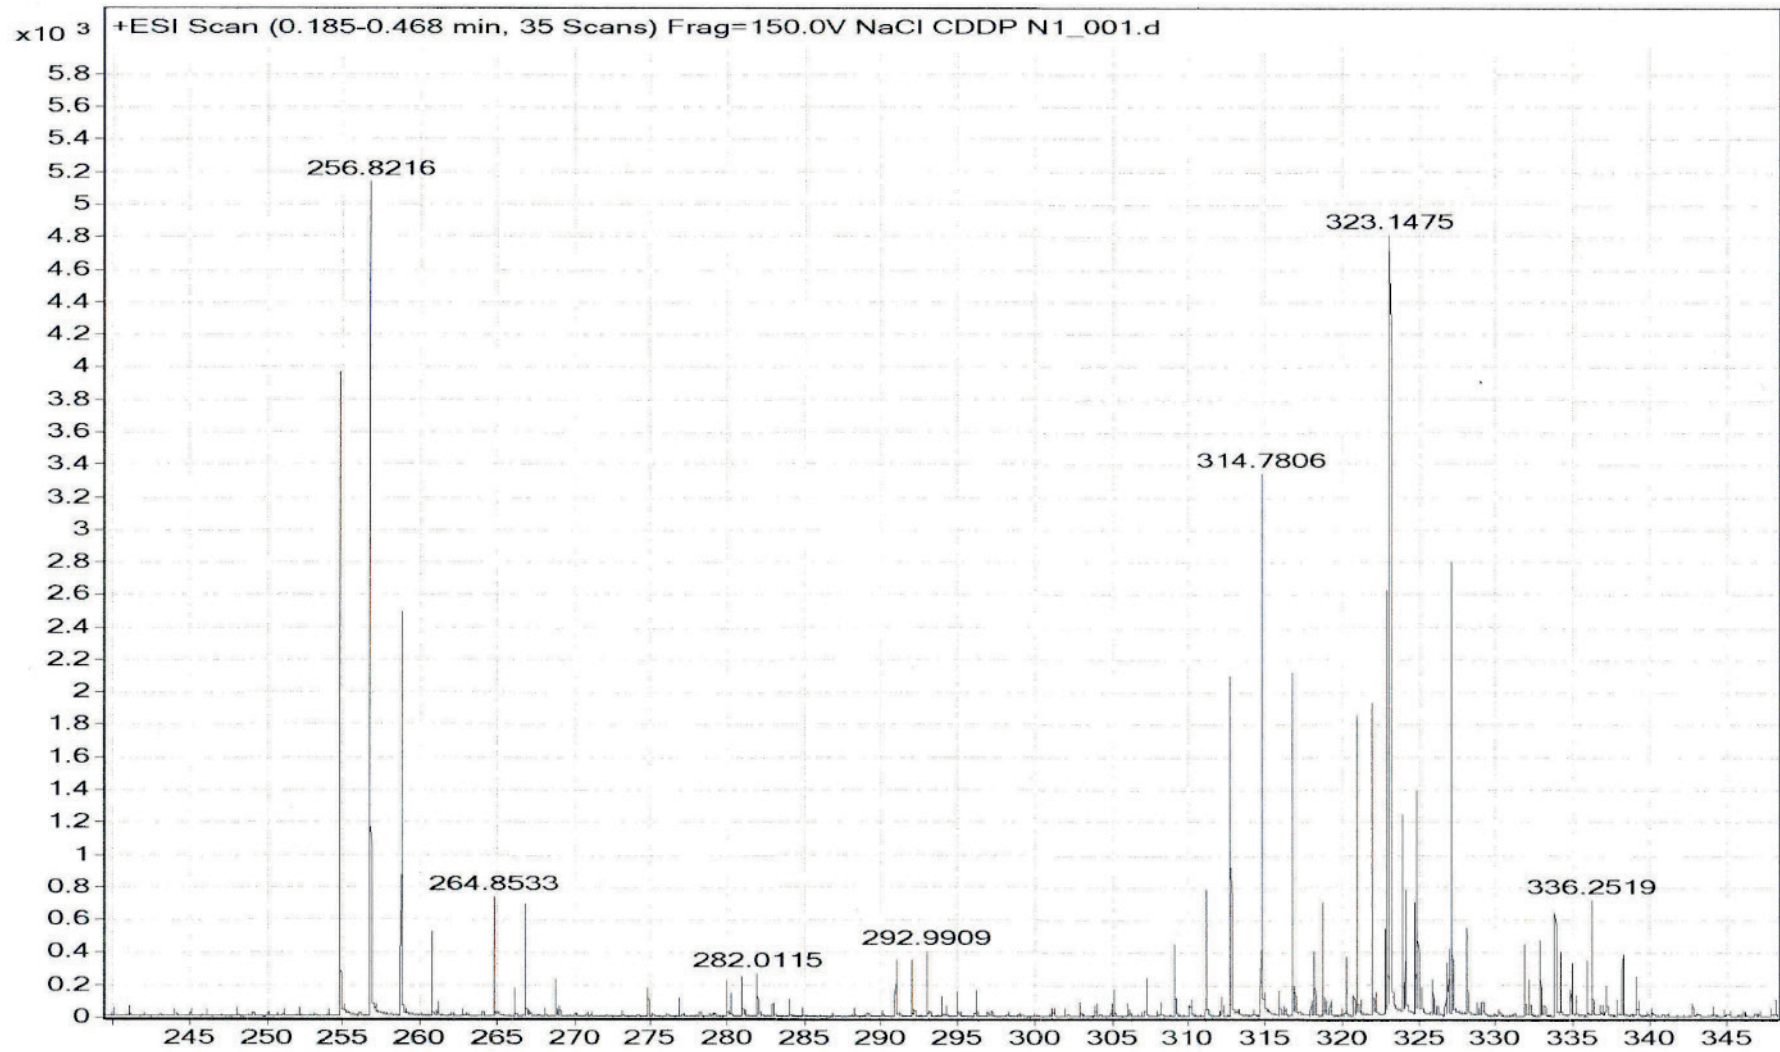

SUPPLEMENTAL FIGURE S18. Zoom-scan high-resolution mass spectrometry (HRMS) spectrum ( $m/z$  245–345) of cisplatin in saline after nanosecond pulses application.

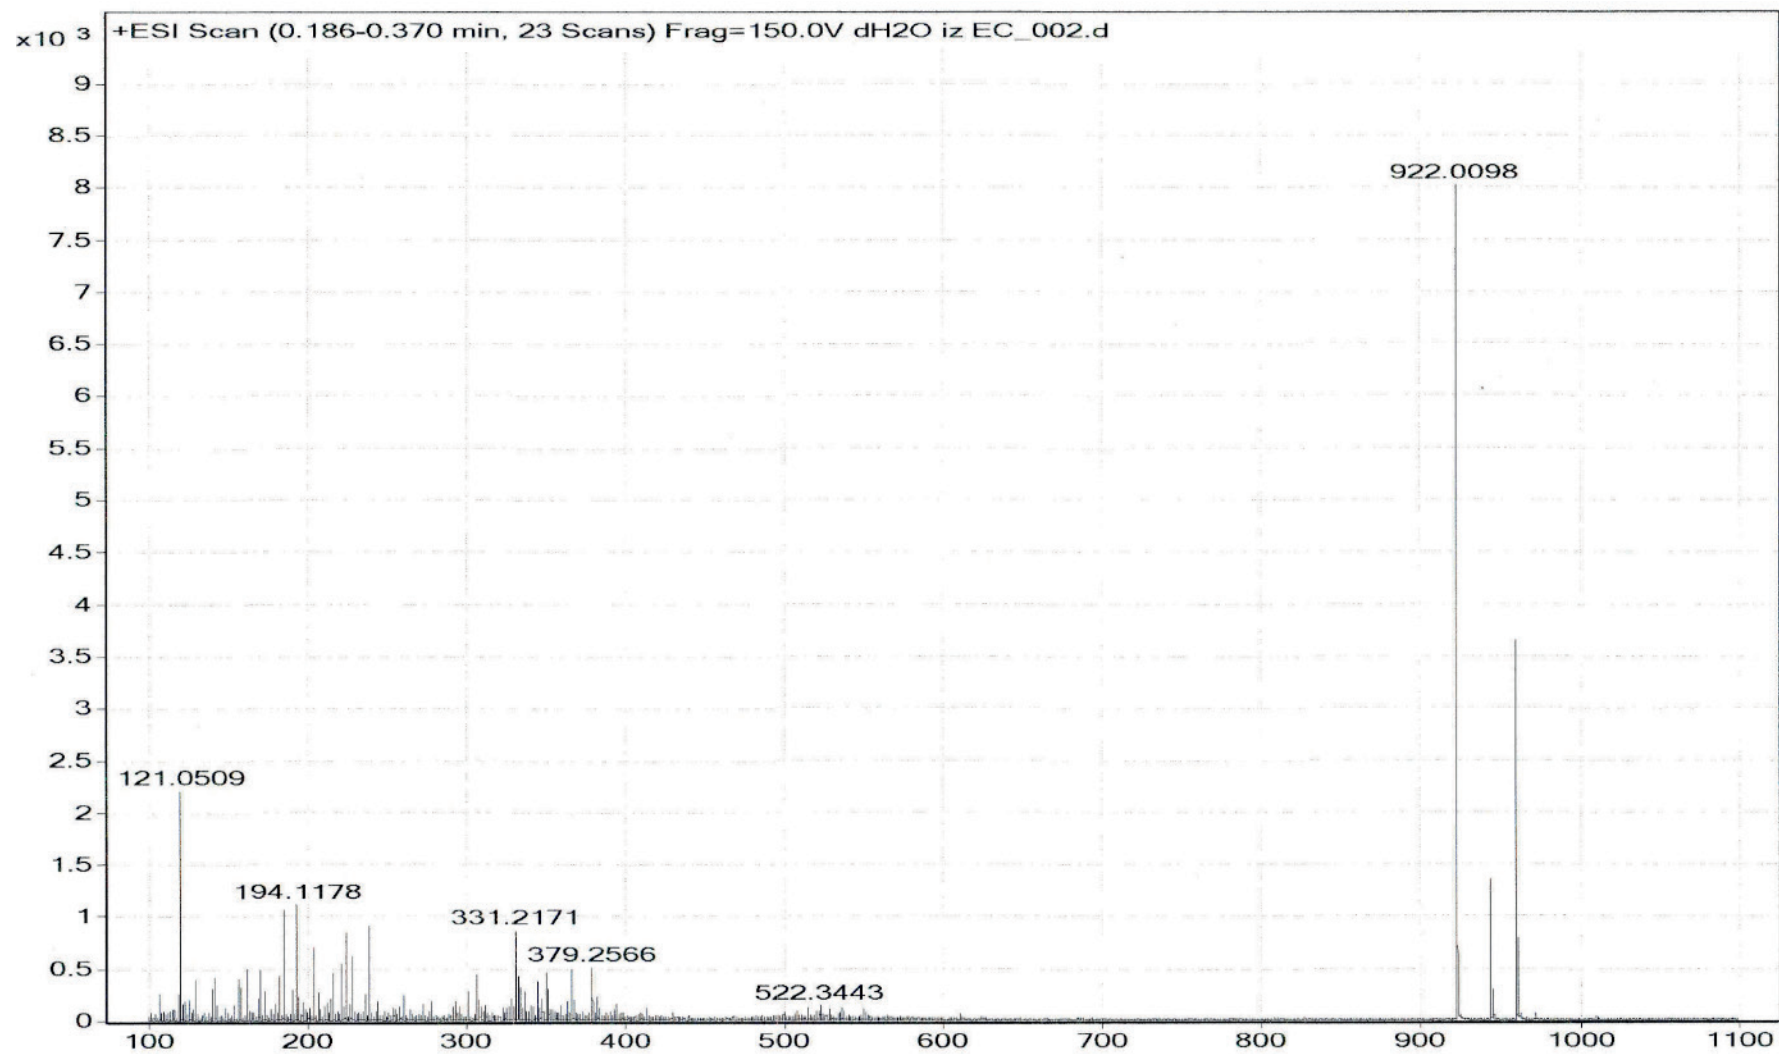

**SUPPLEMENTAL FIGURE S19.** Full-scan high-resolution mass spectrometry (HRMS) spectrum of water from electroporation cuvette without application of electric pulses.

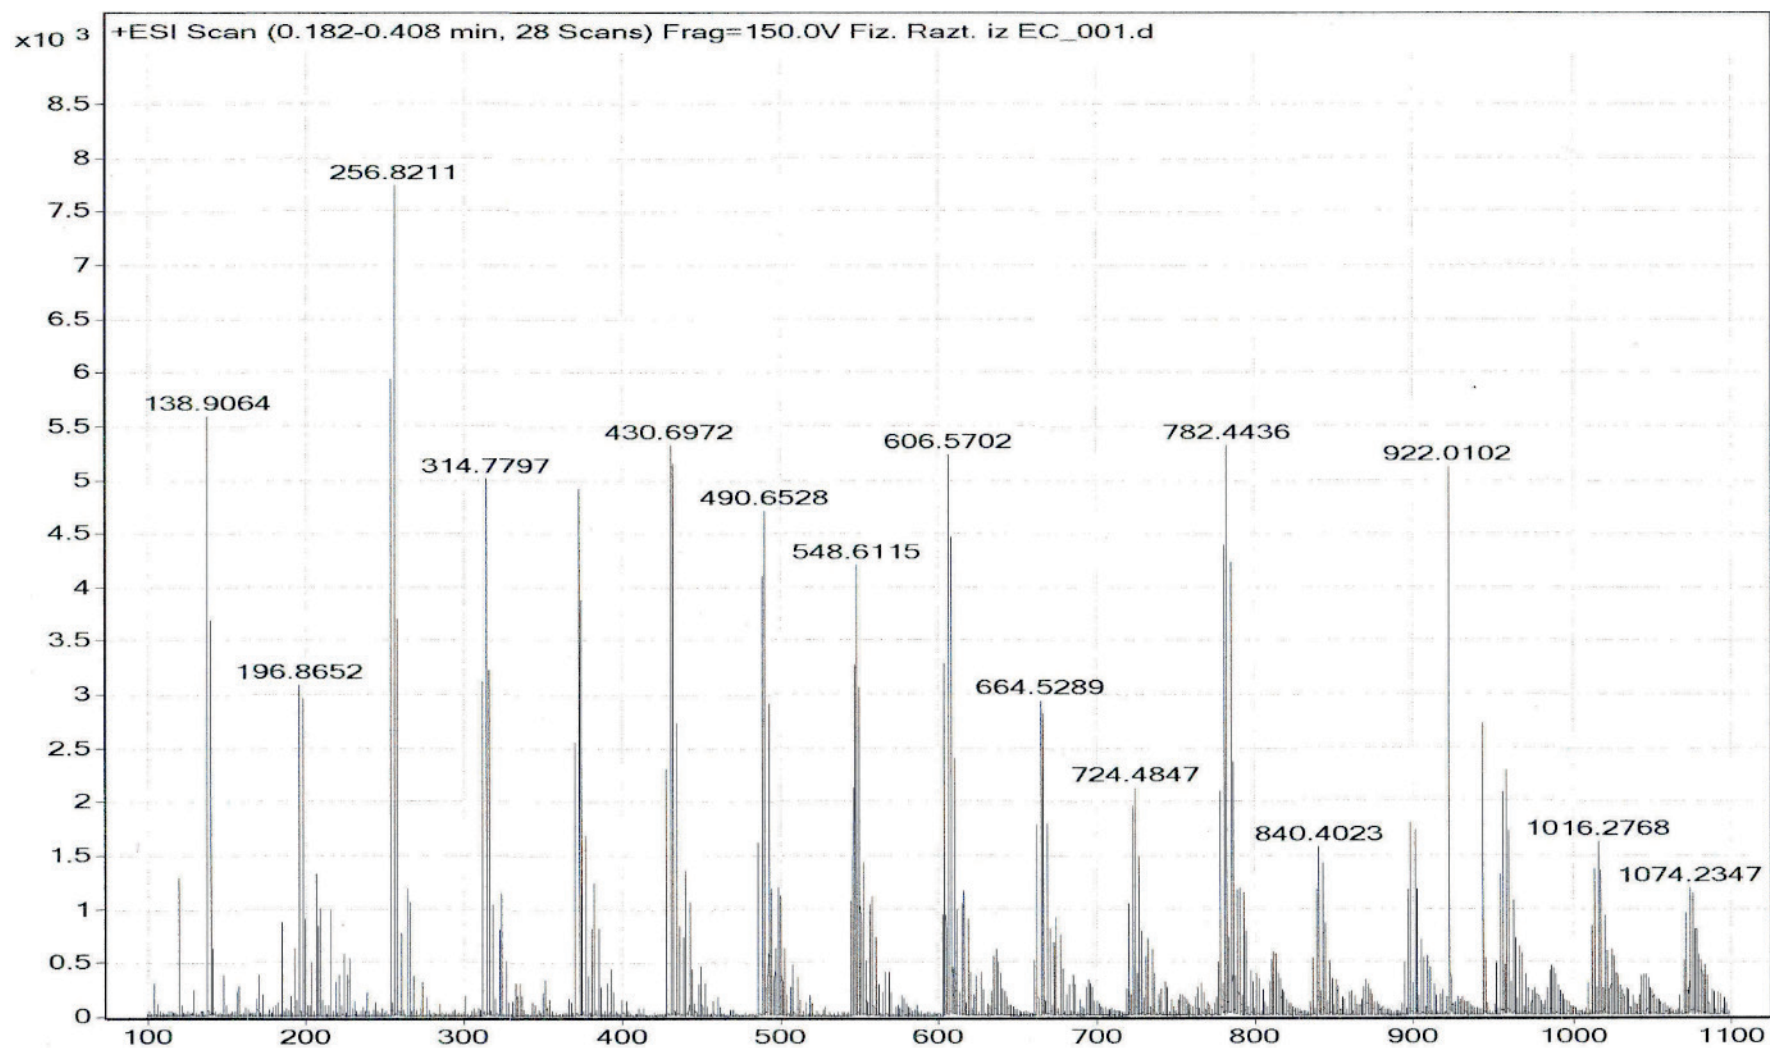

**SUPPLEMENTAL FIGURE S20.** Full-scan high-resolution mass spectrometry (HRMS) spectrum of saline from electroporation cuvette without application of electric pulses.
